# Supplementary material
Source: publisher figshare collection journal article supplement (https://tandf.figshare.com/ndownloader/files/25430850)

## Support Information

### Effect of 3-Substitution of Quinolinehydroxamic Acids on Selectivity of Histone Deacetylase Isoforms

Samir Mehndiratta, Mei-Chuan Chen, Yuh-Hsuan Chao, Cheng-Hsin Lee,  
Jing-Ping Liou, Mei-Jung Lai,\* Hsueh-Yun Lee\*

#### Contents:

|                                                              |       |
|--------------------------------------------------------------|-------|
| <sup>1</sup> H NMR Spectra for compounds <b>14-29</b> .....  | SI-2  |
| <sup>13</sup> C NMR Spectra for compounds <b>14-29</b> ..... | SI-18 |

<sup>1</sup>H Spectra for compound 14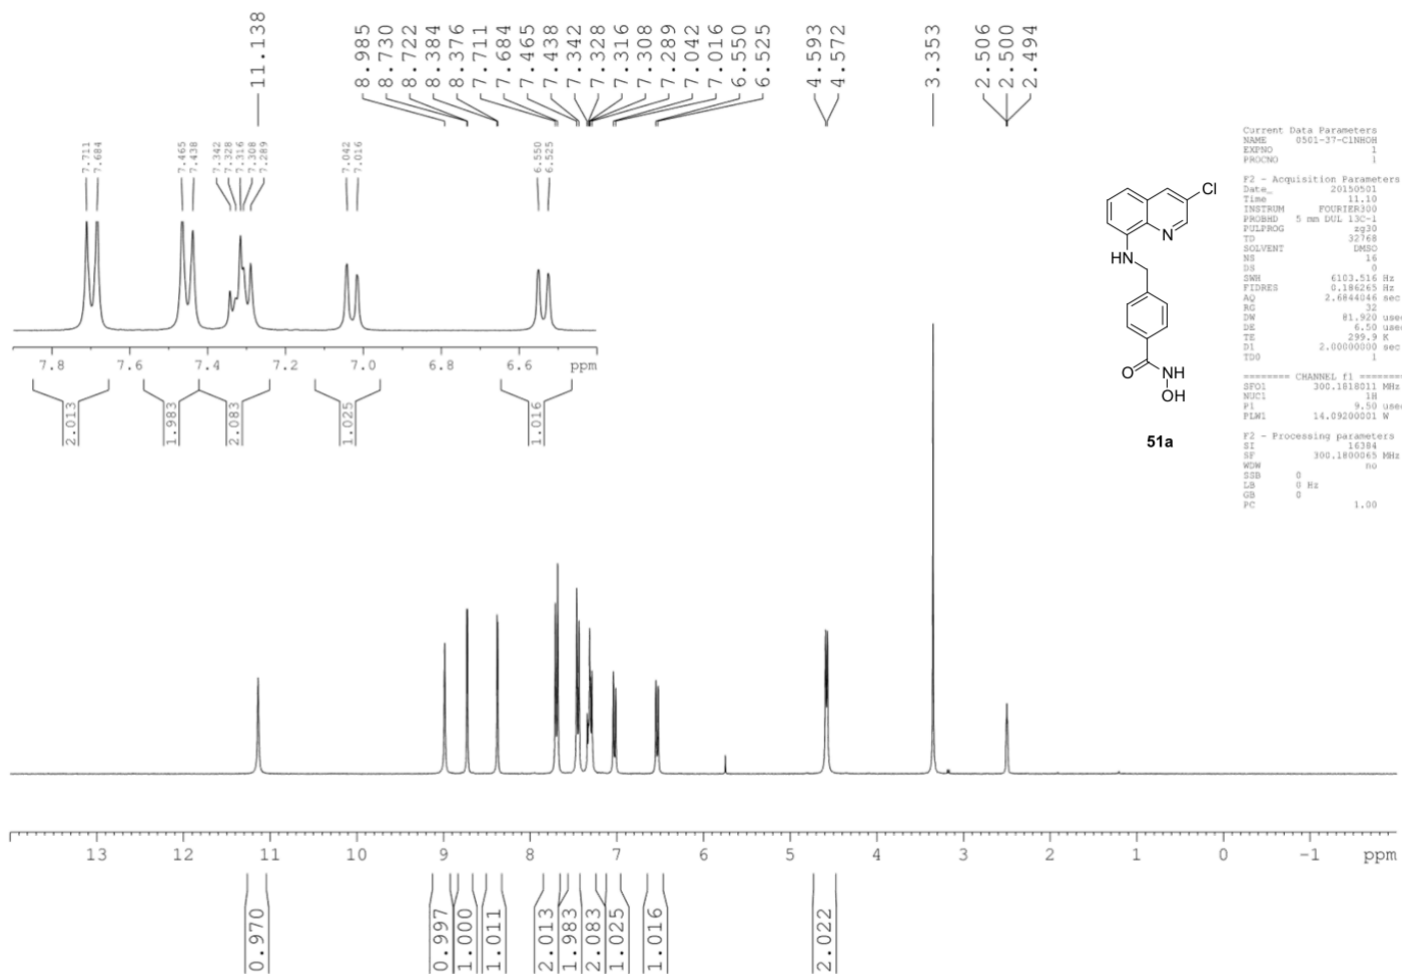

<sup>1</sup>H Spectra for compound 15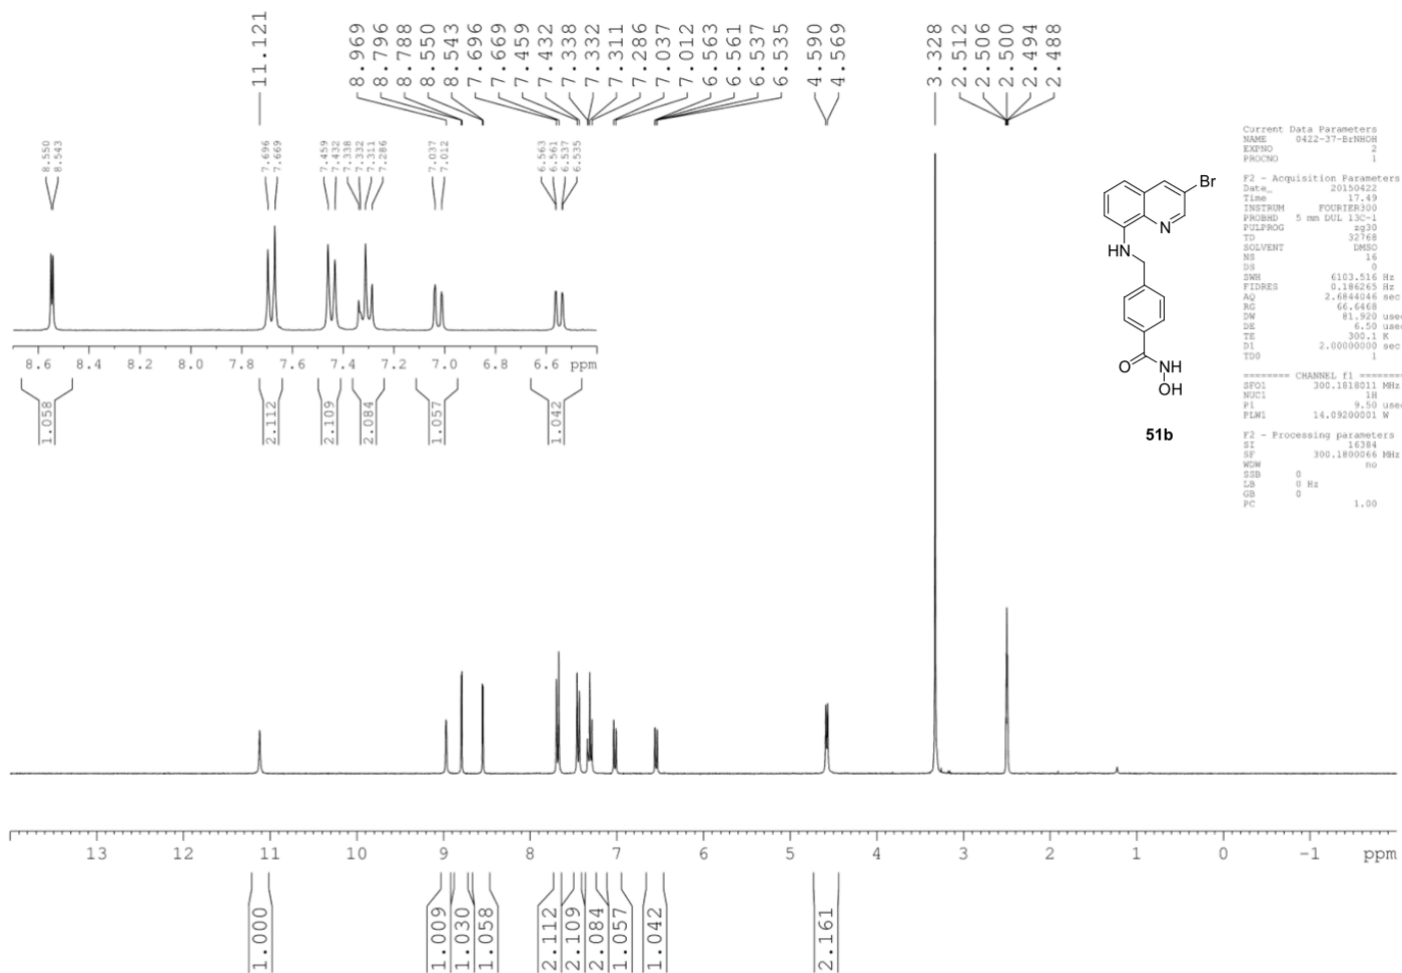

**<sup>1</sup>H Spectra for compound 16**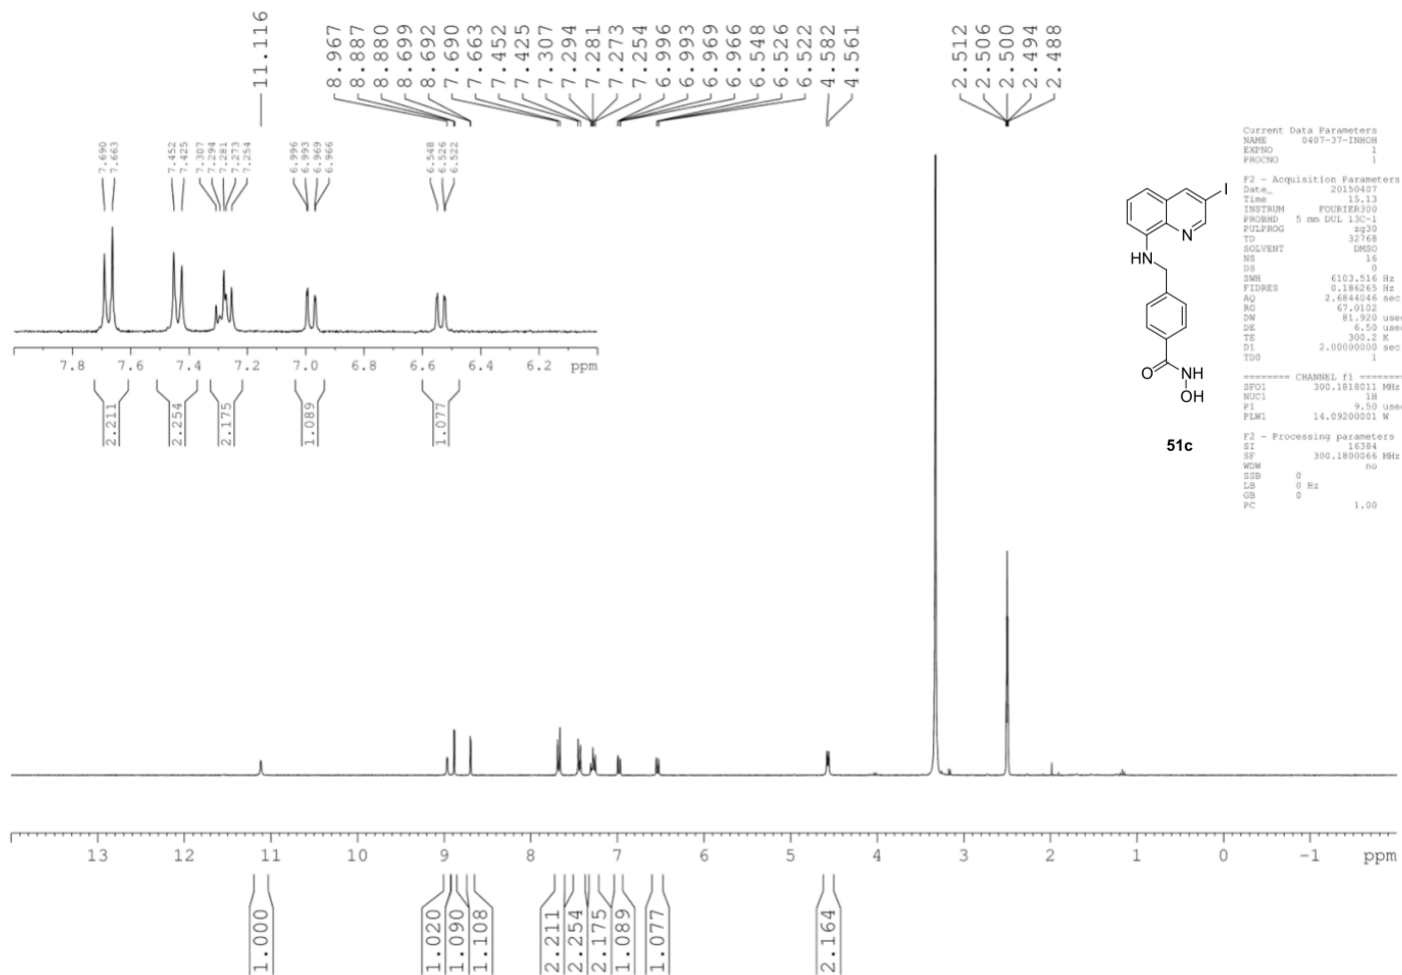

**<sup>1</sup>H Spectra for compound 17**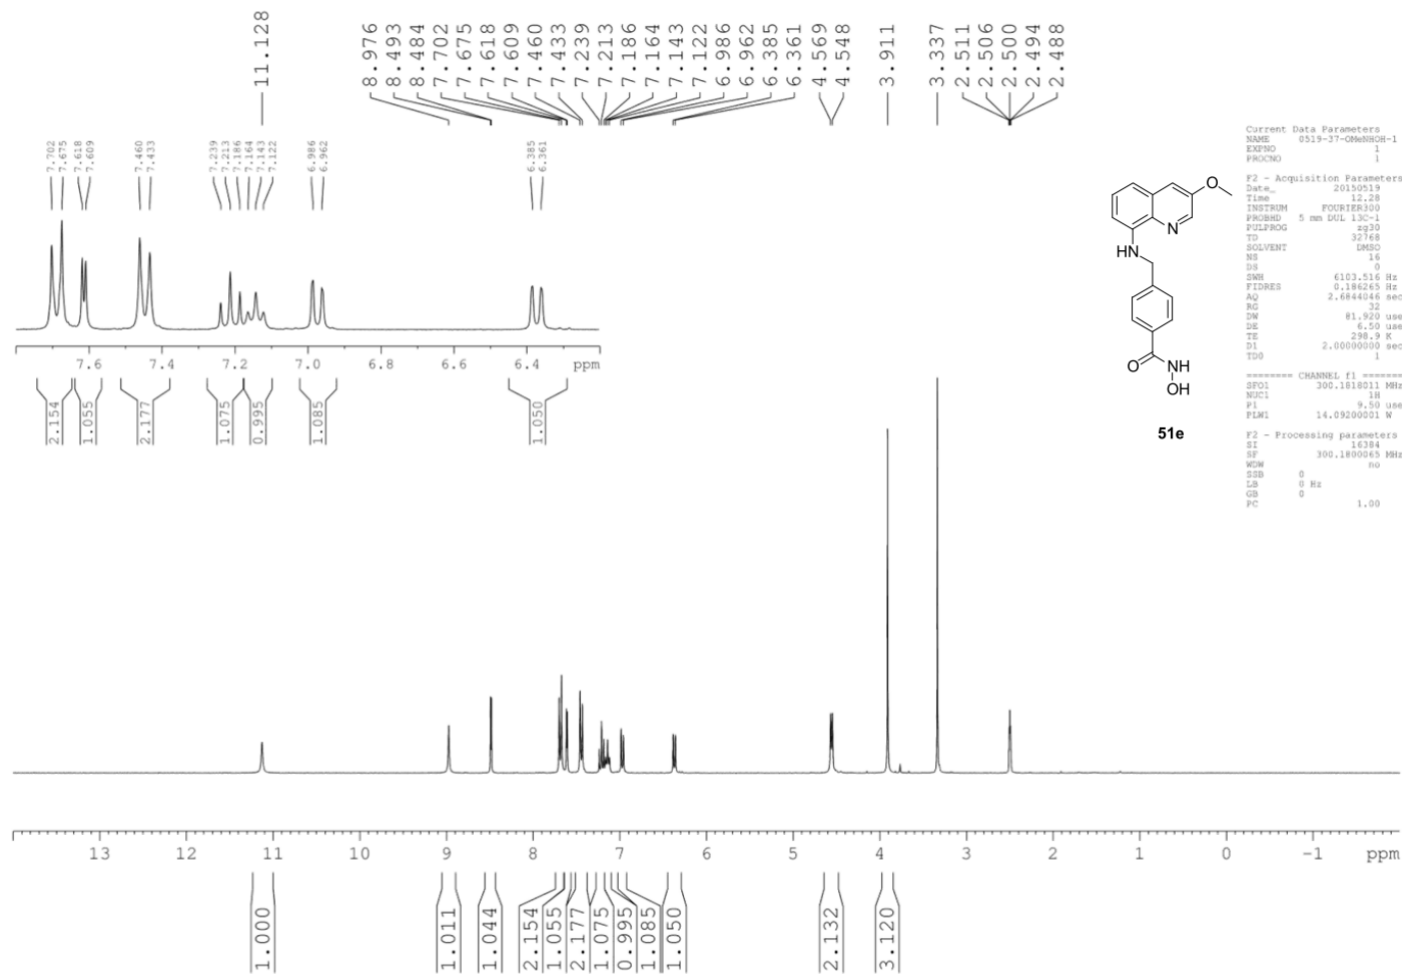

**<sup>1</sup>H Spectra for compound 18**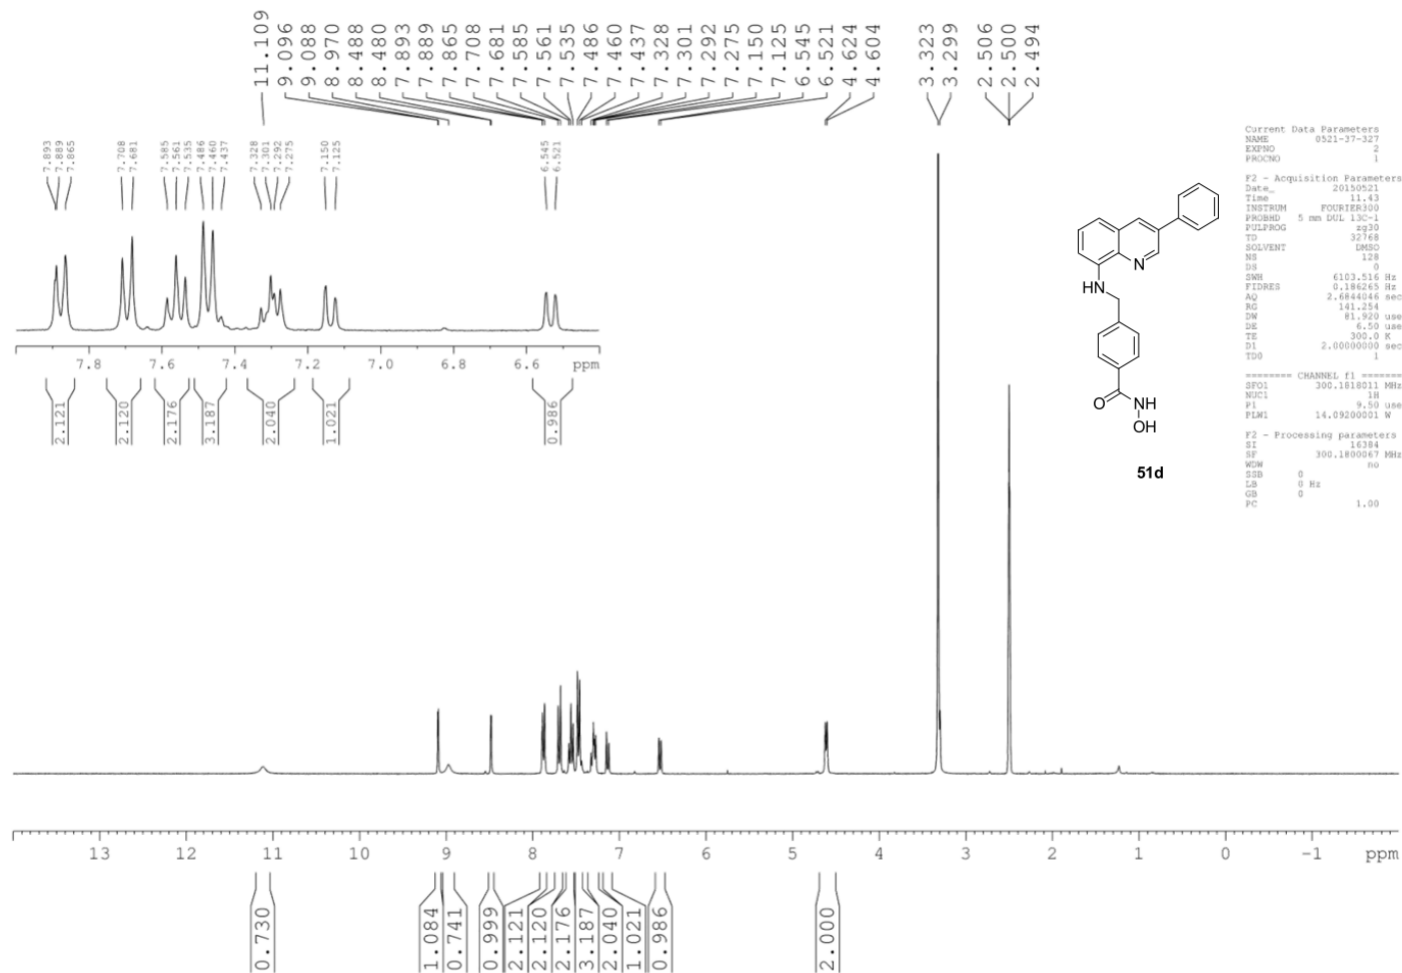

<sup>1</sup>H Spectra for compound 19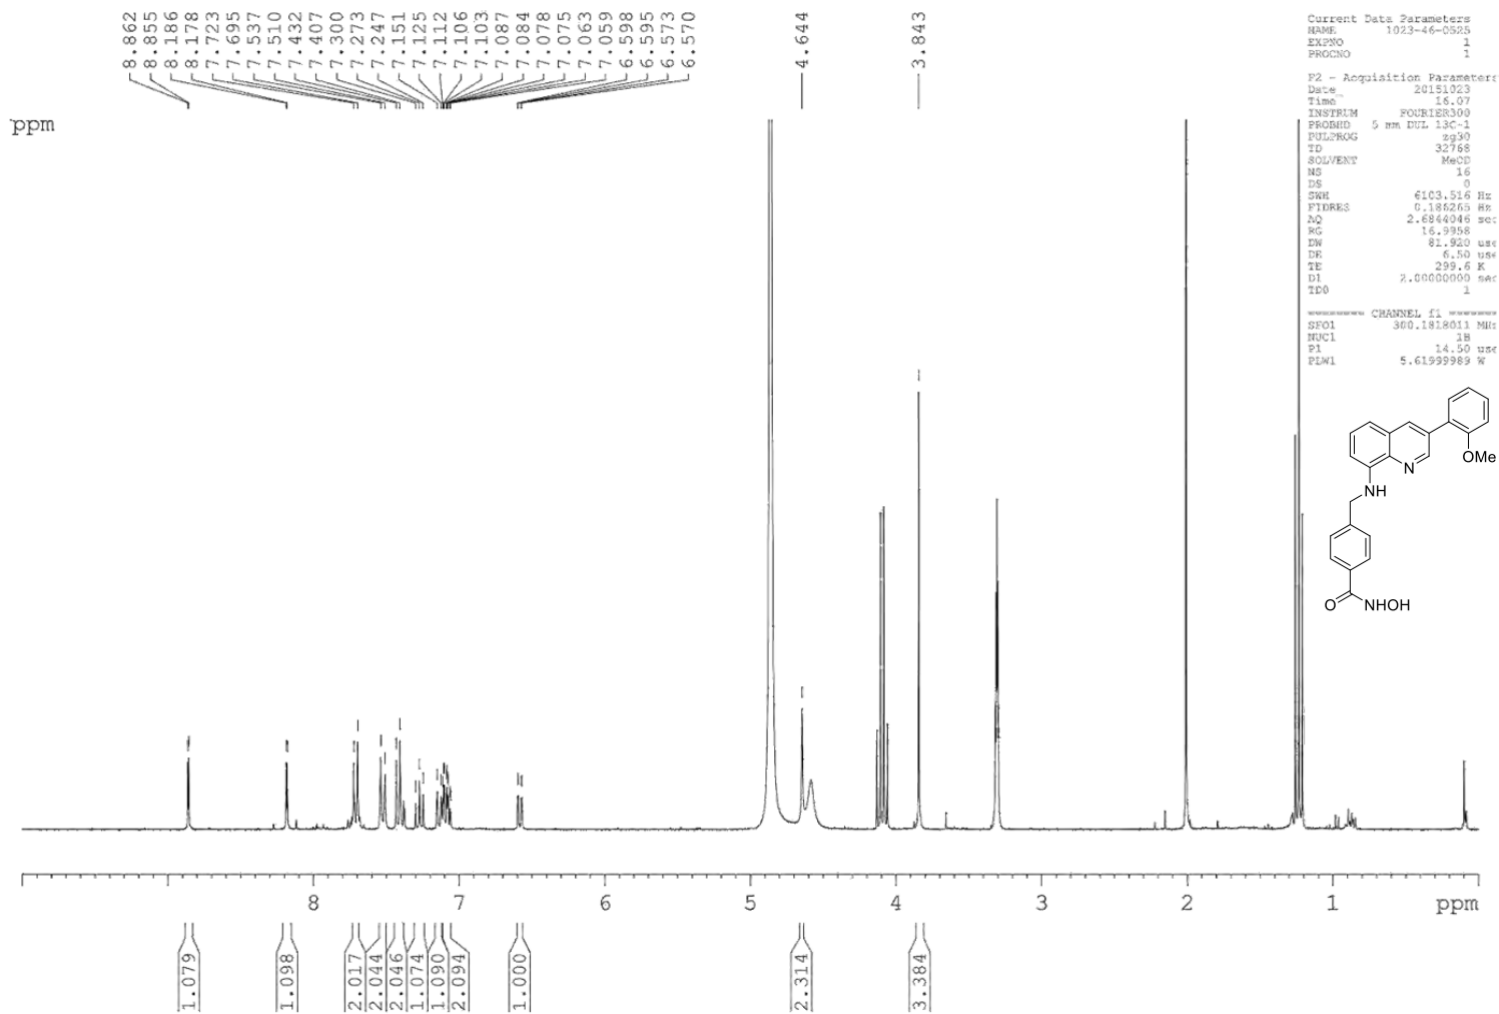

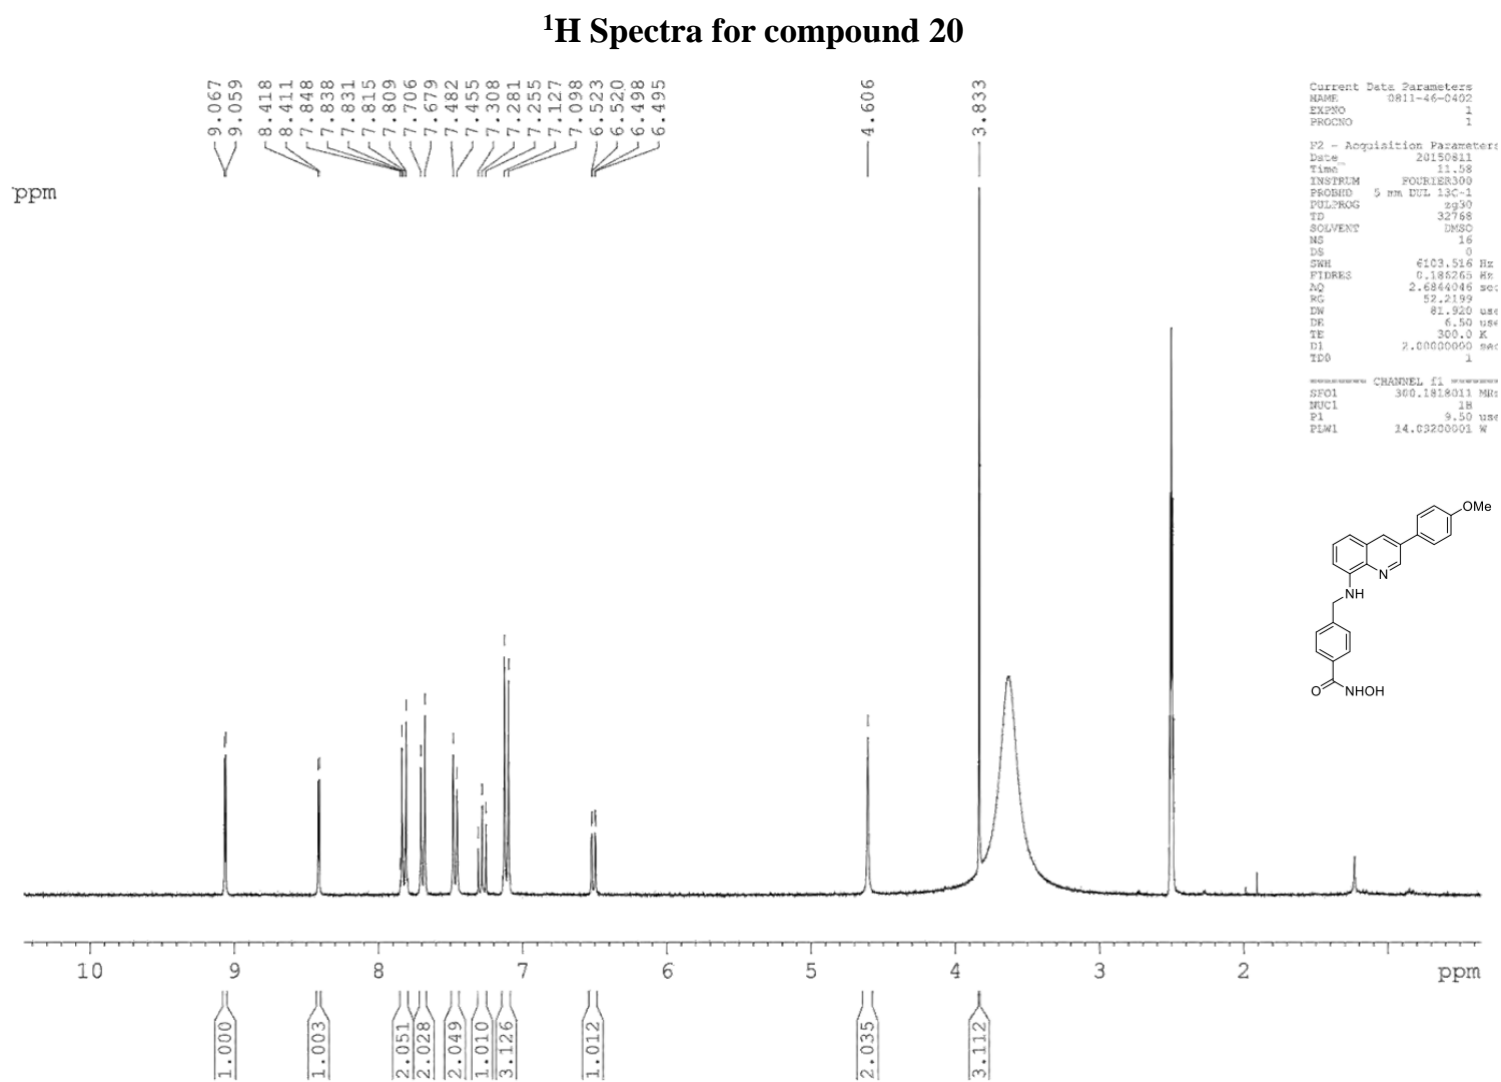



<sup>1</sup>H Spectra for compound 21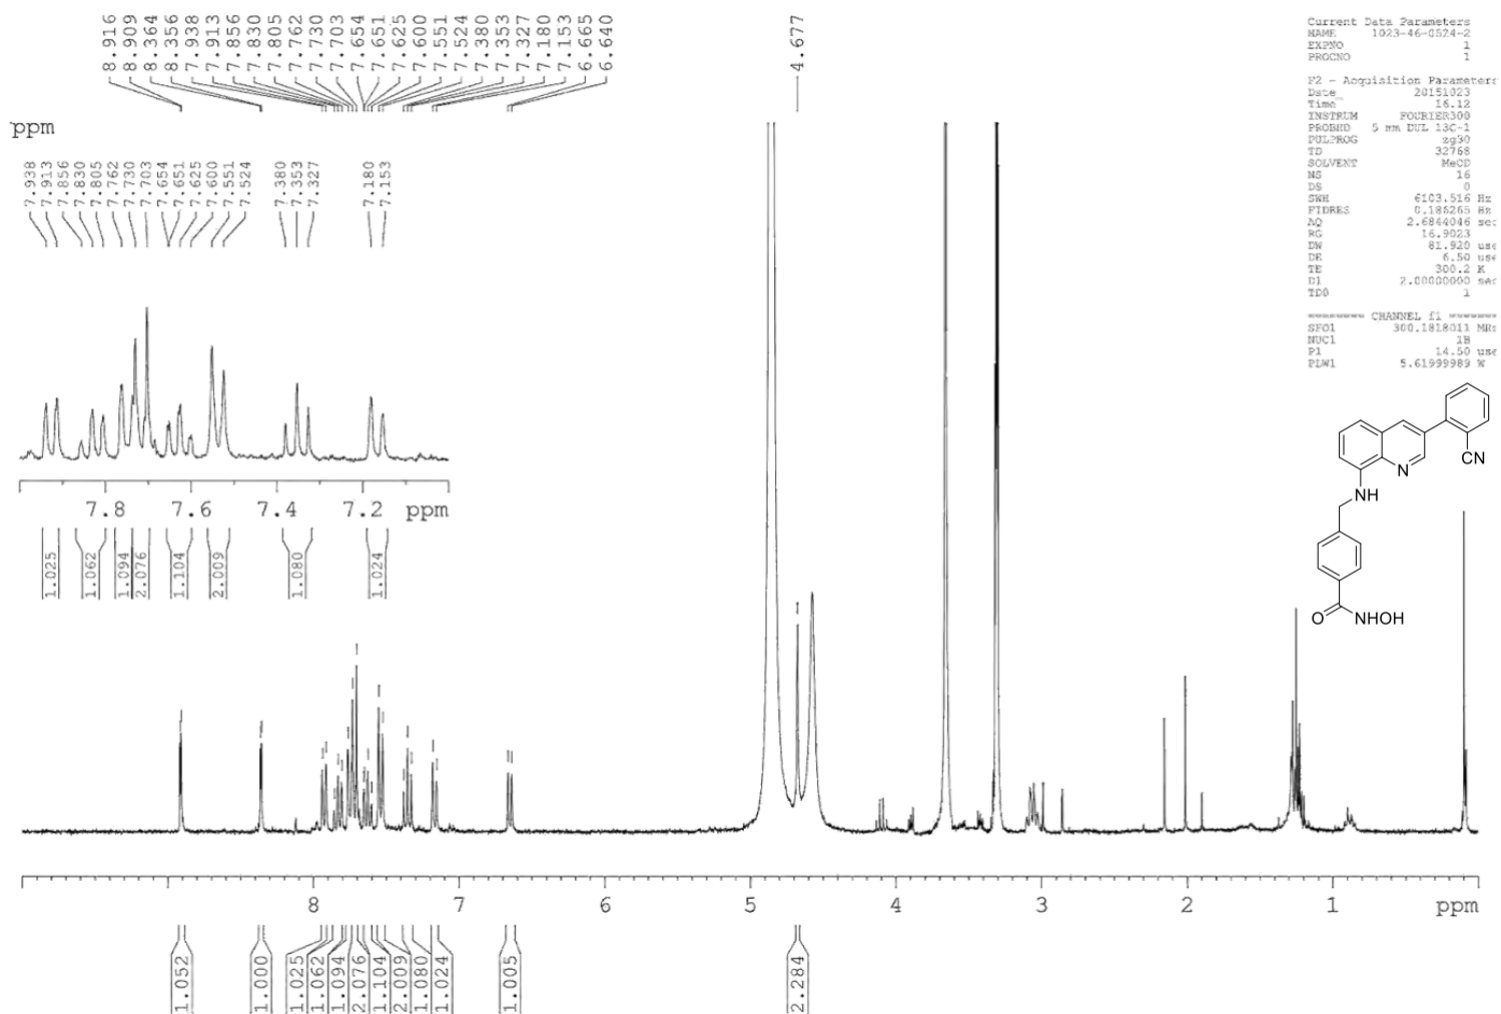

<sup>1</sup>H Spectra for compound 22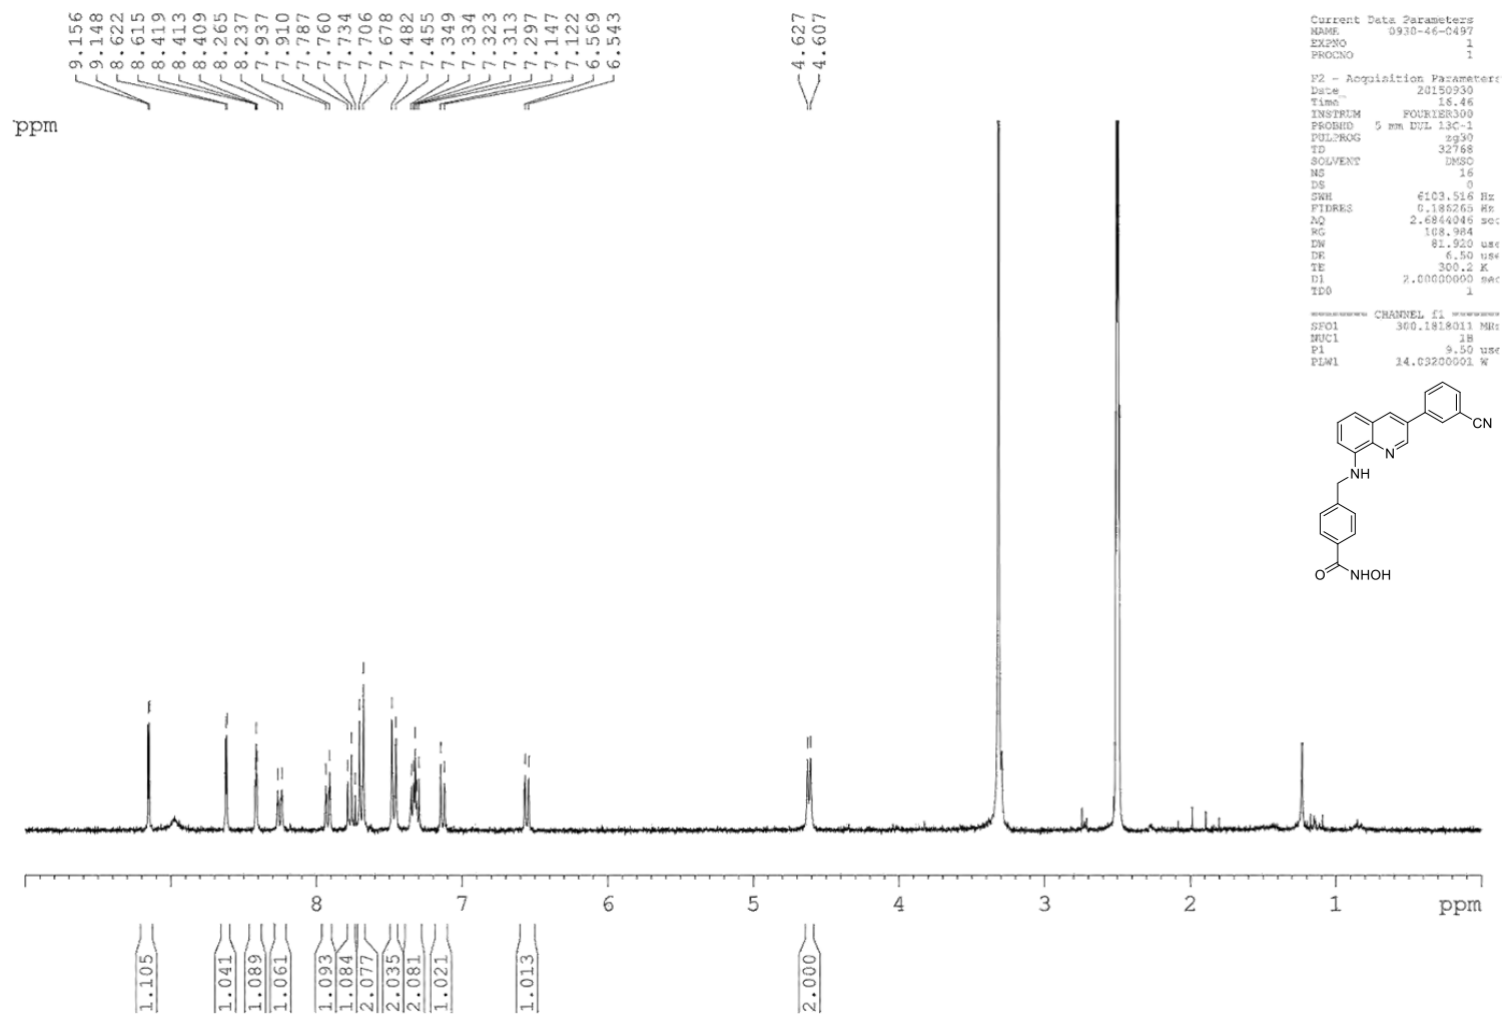

<sup>1</sup>H Spectra for compound 23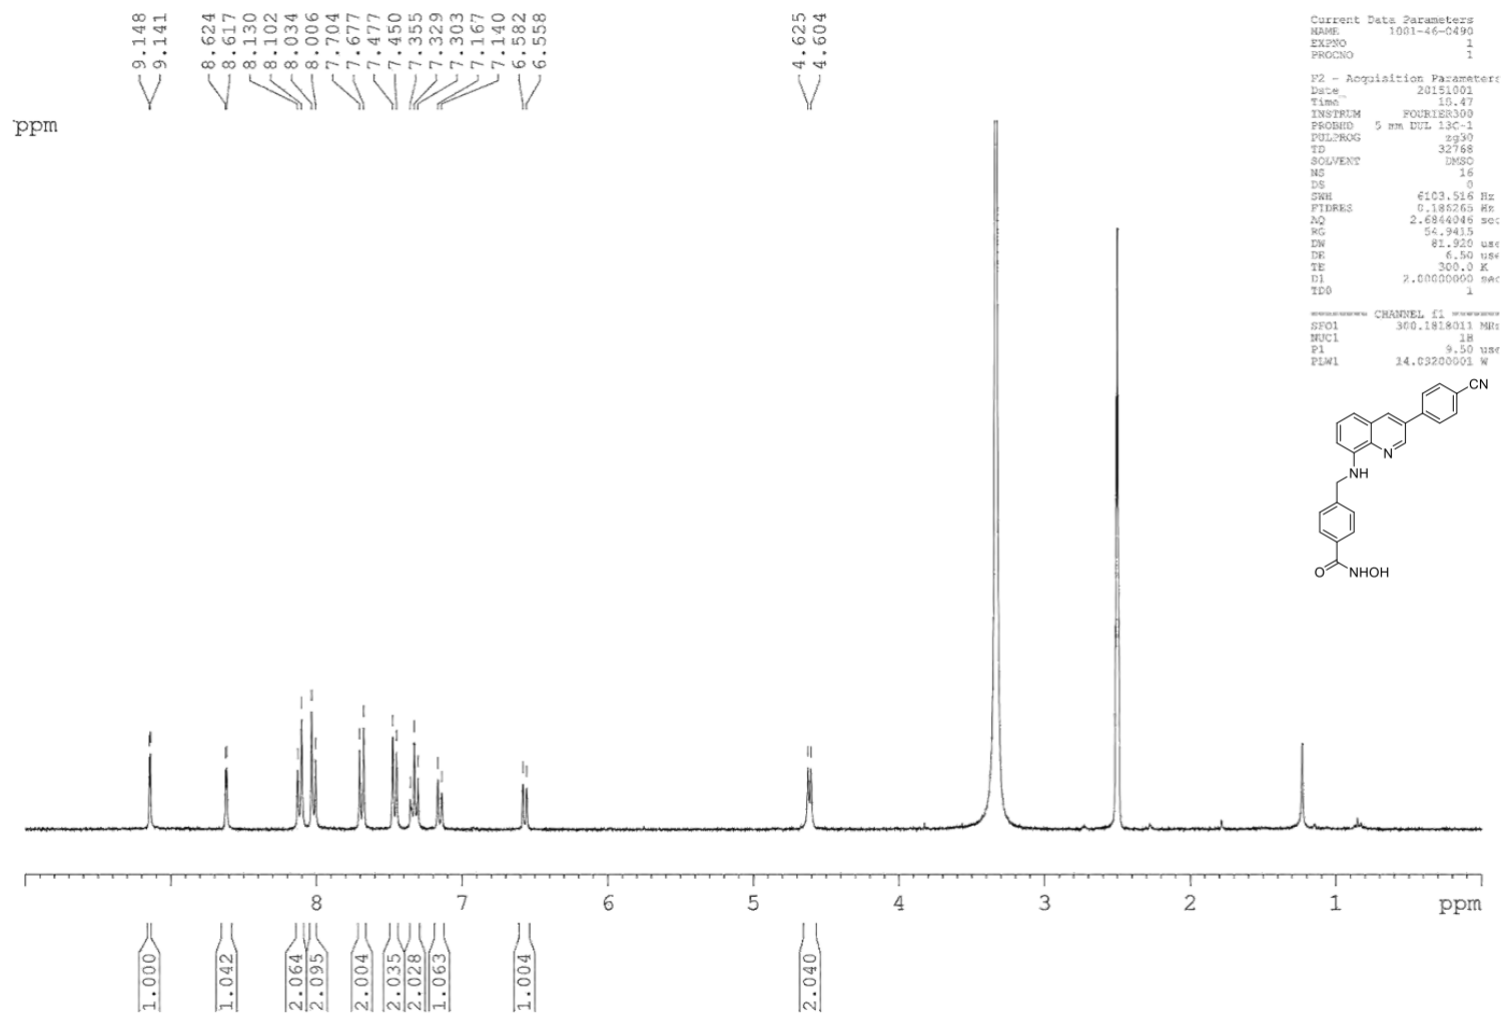

**<sup>1</sup>H Spectra for compound 24**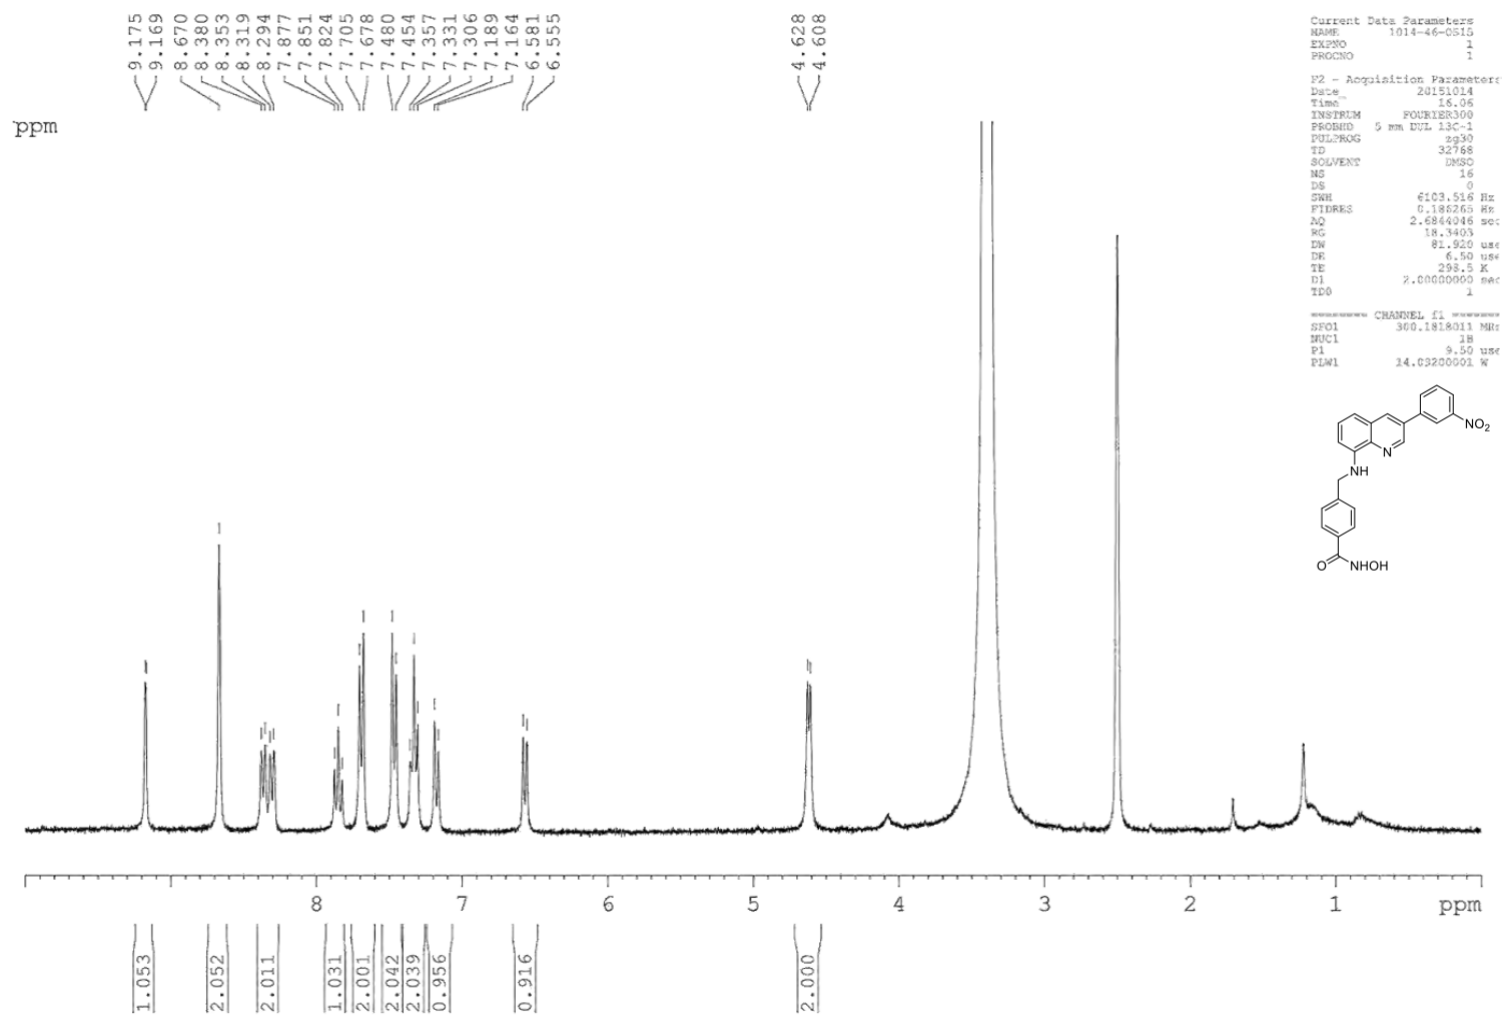

**<sup>1</sup>H Spectra for compound 25**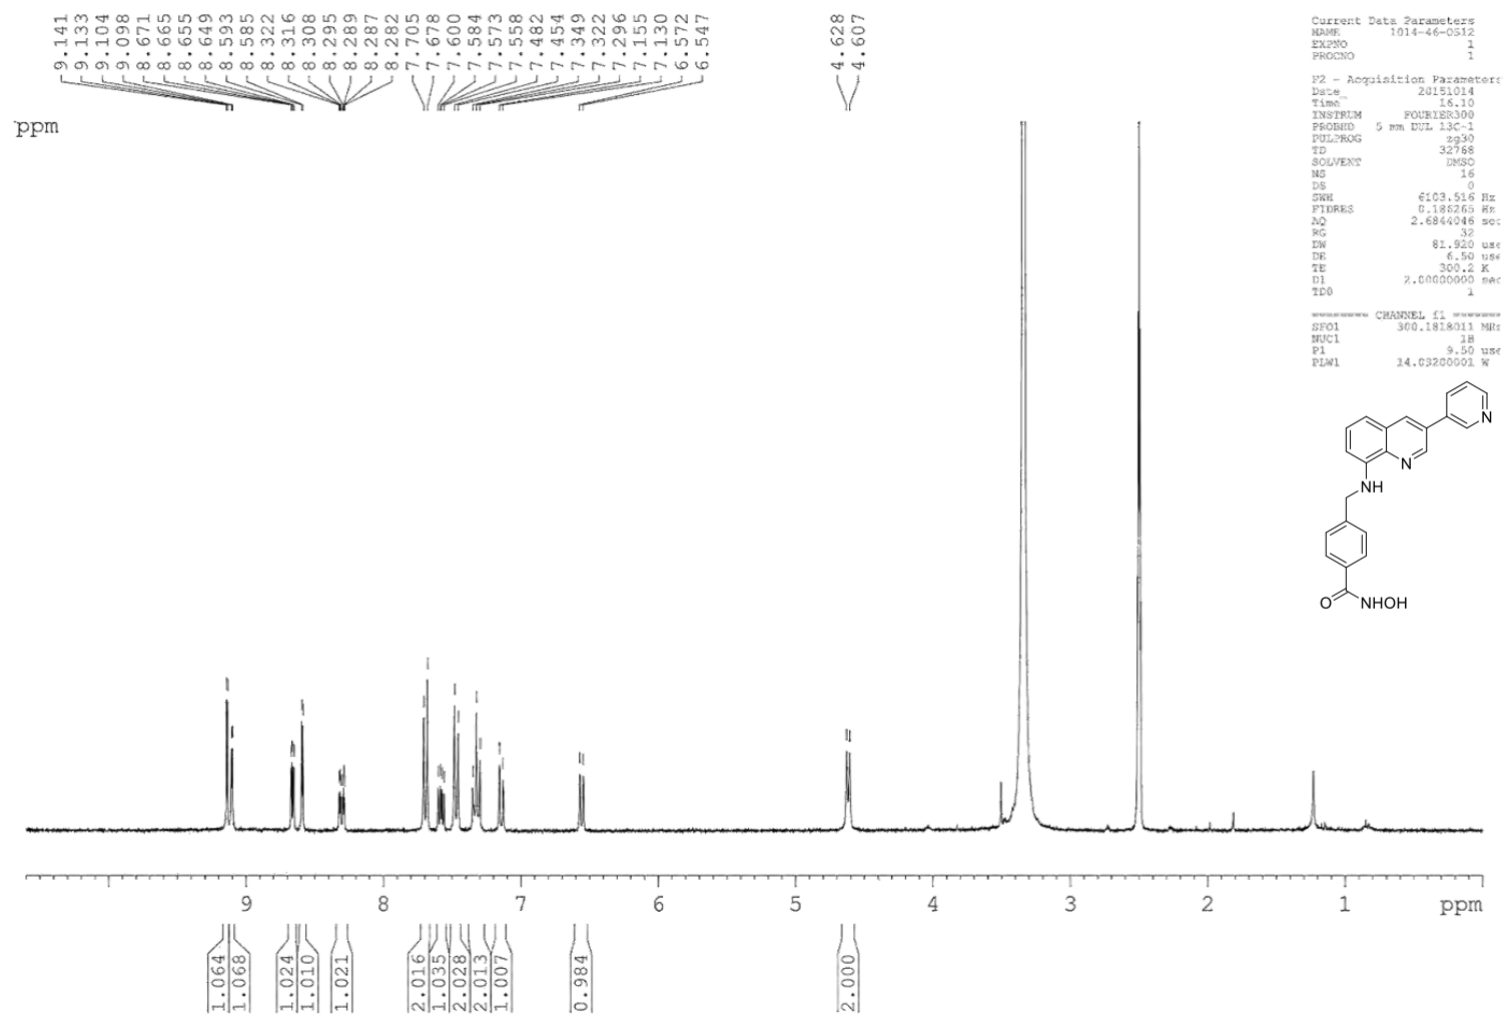

**<sup>1</sup>H Spectra for compound 26**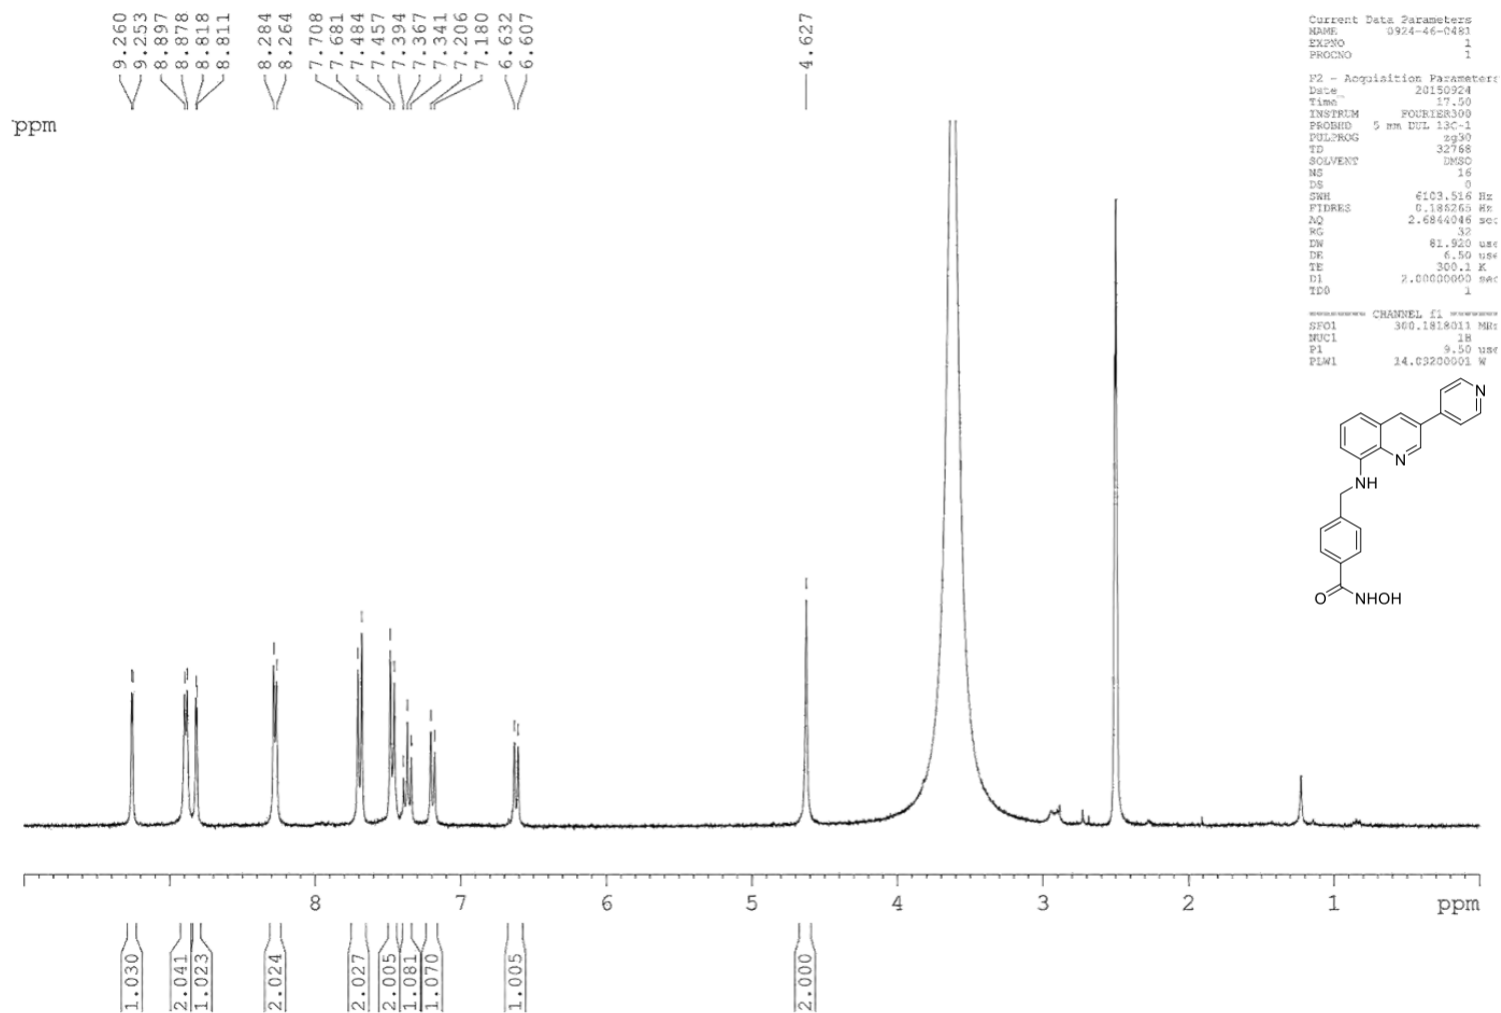

<sup>1</sup>H Spectra for compound 27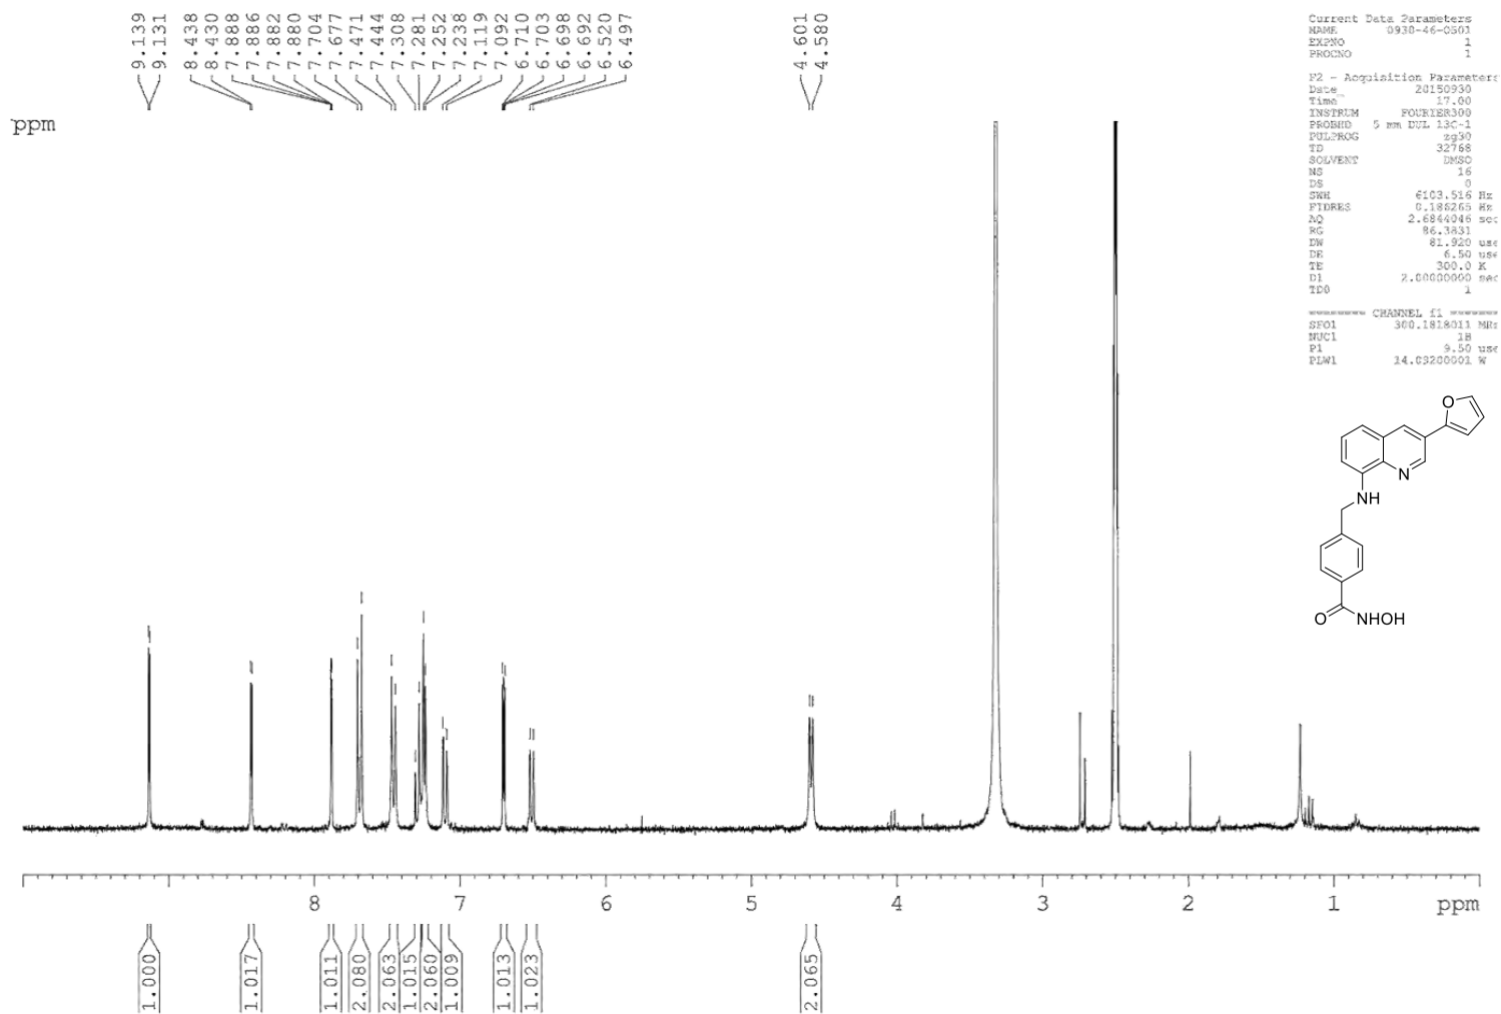

**$^1\text{H}$  Spectra for compound 28**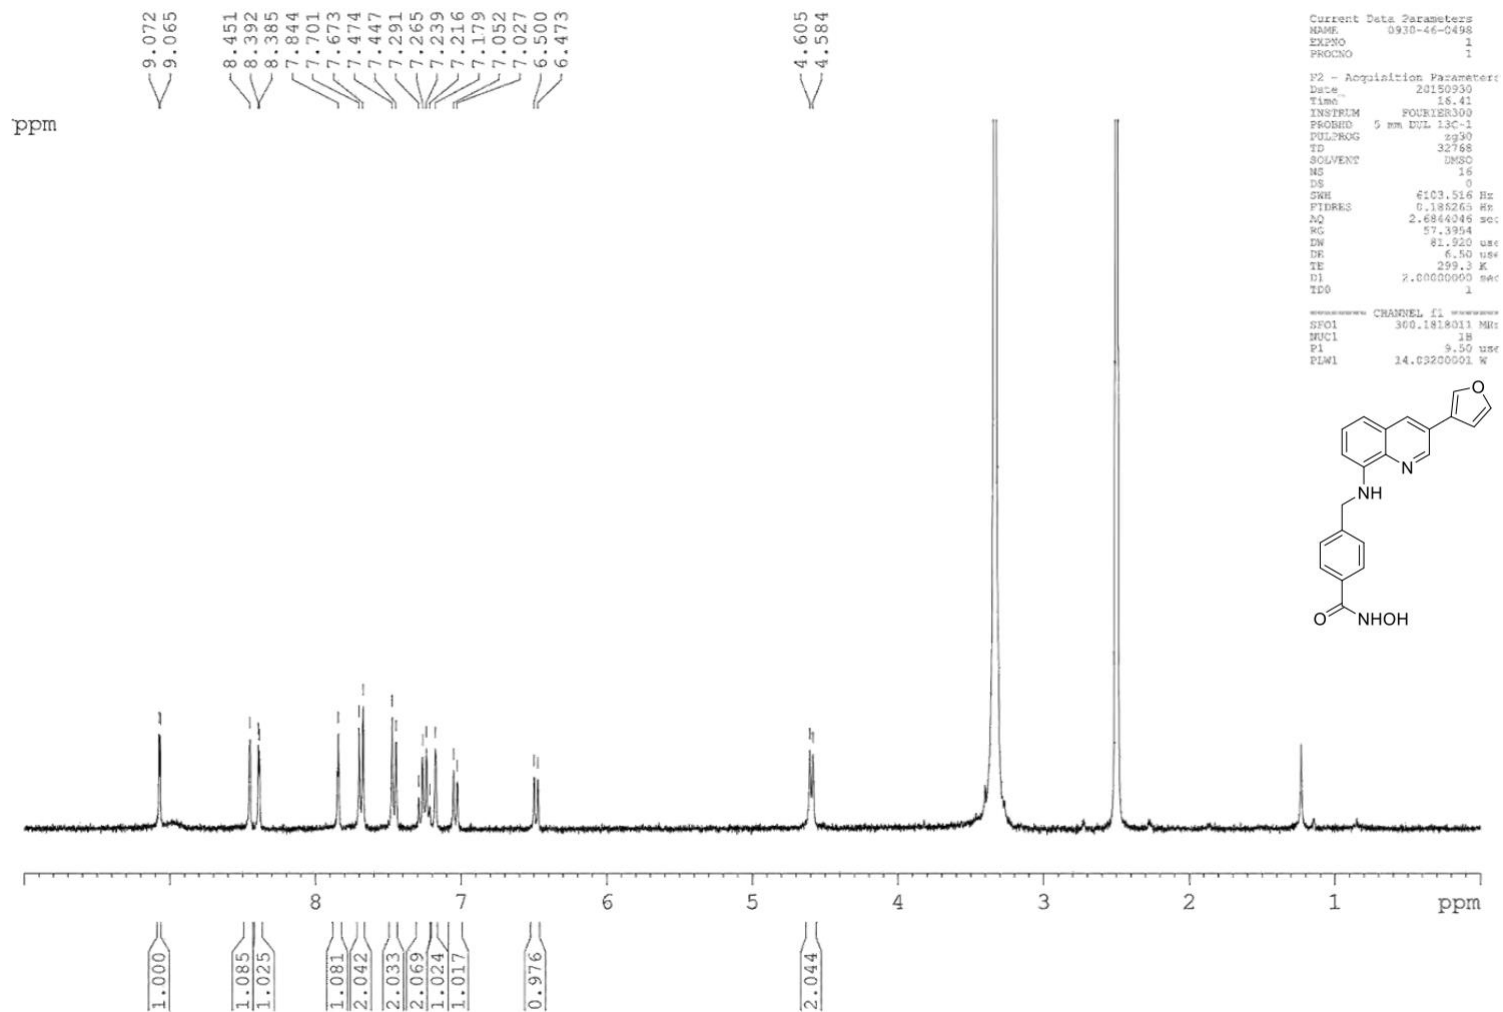



### <sup>1</sup>H Spectra for compound 29

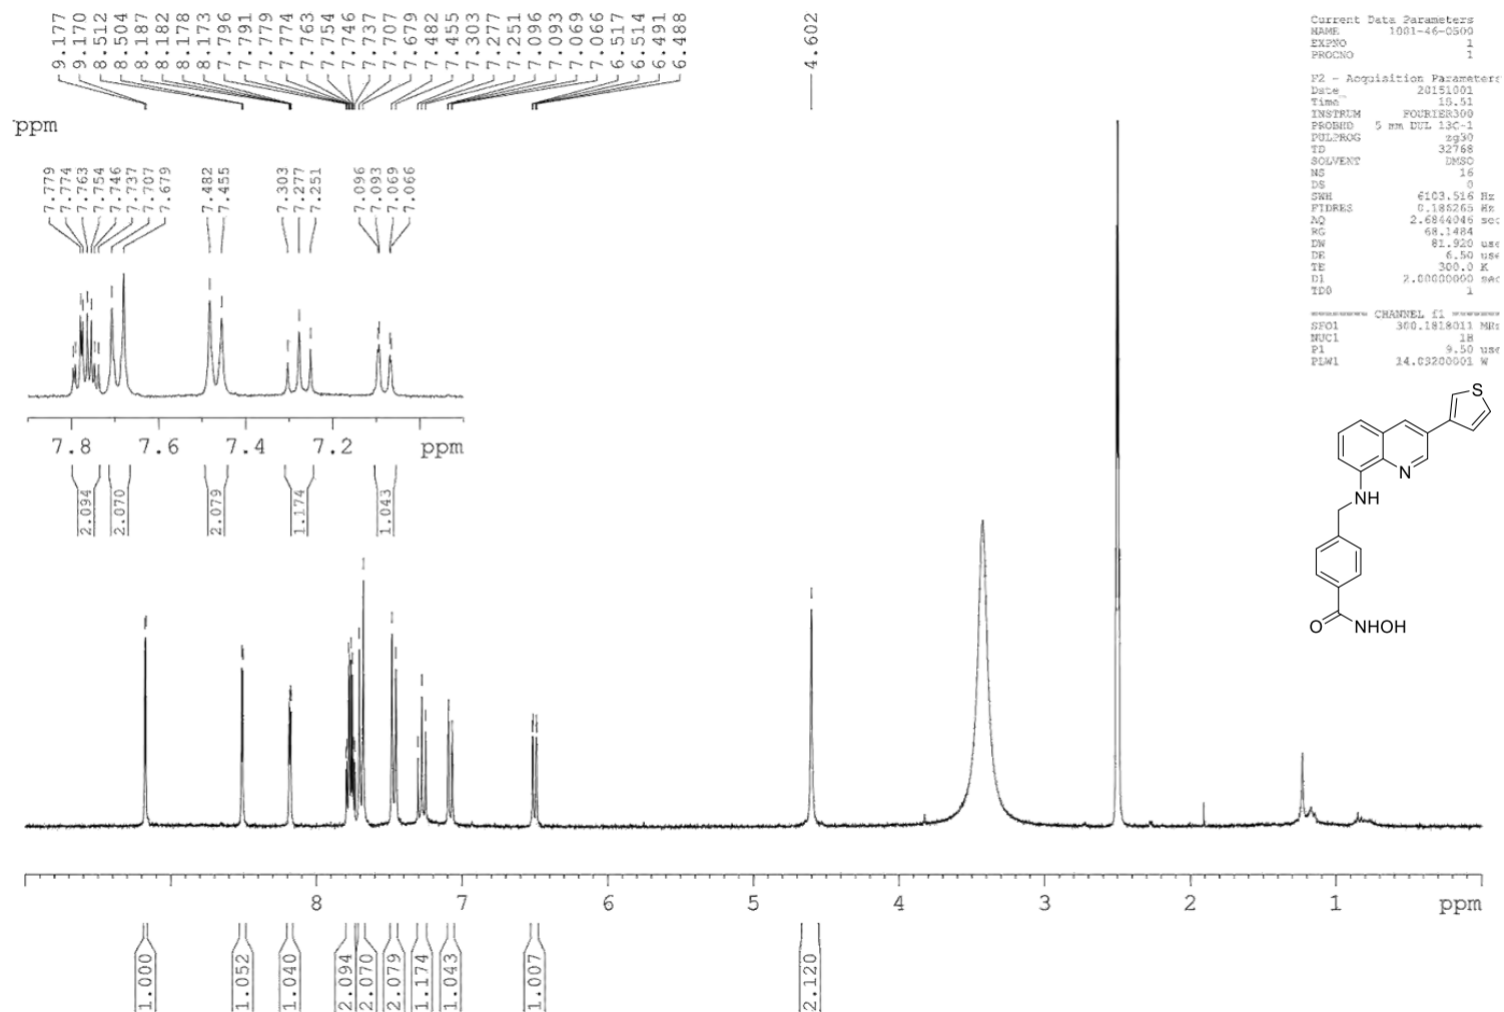

**$^{13}\text{C}$  Spectra for compound 14**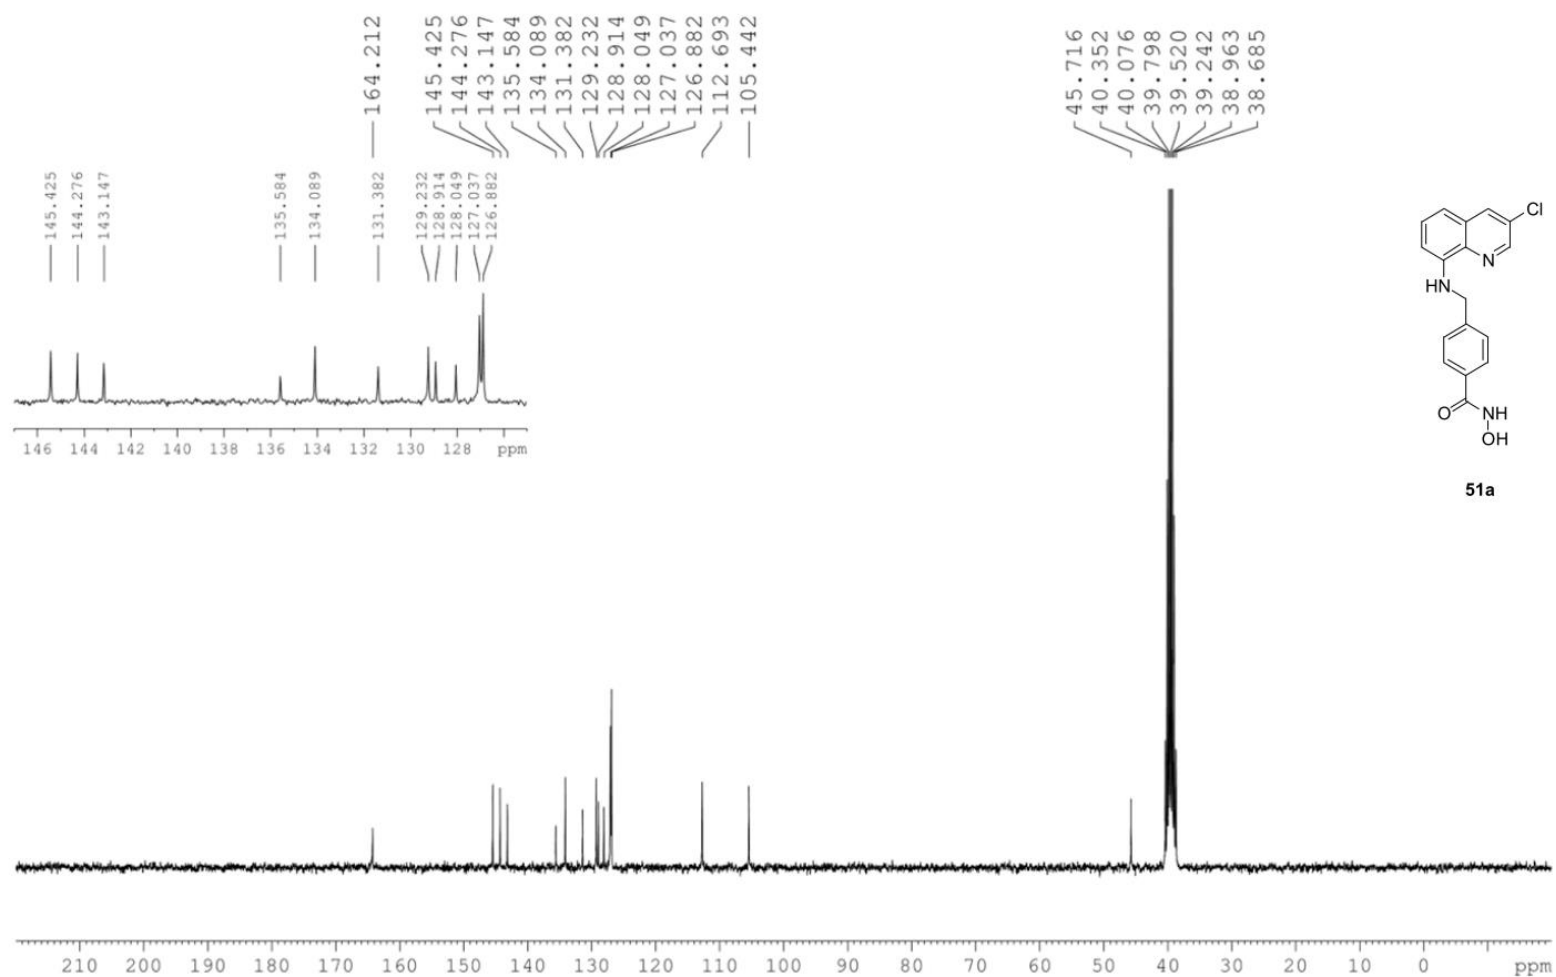

**$^{13}\text{C}$  Spectra for compound 15**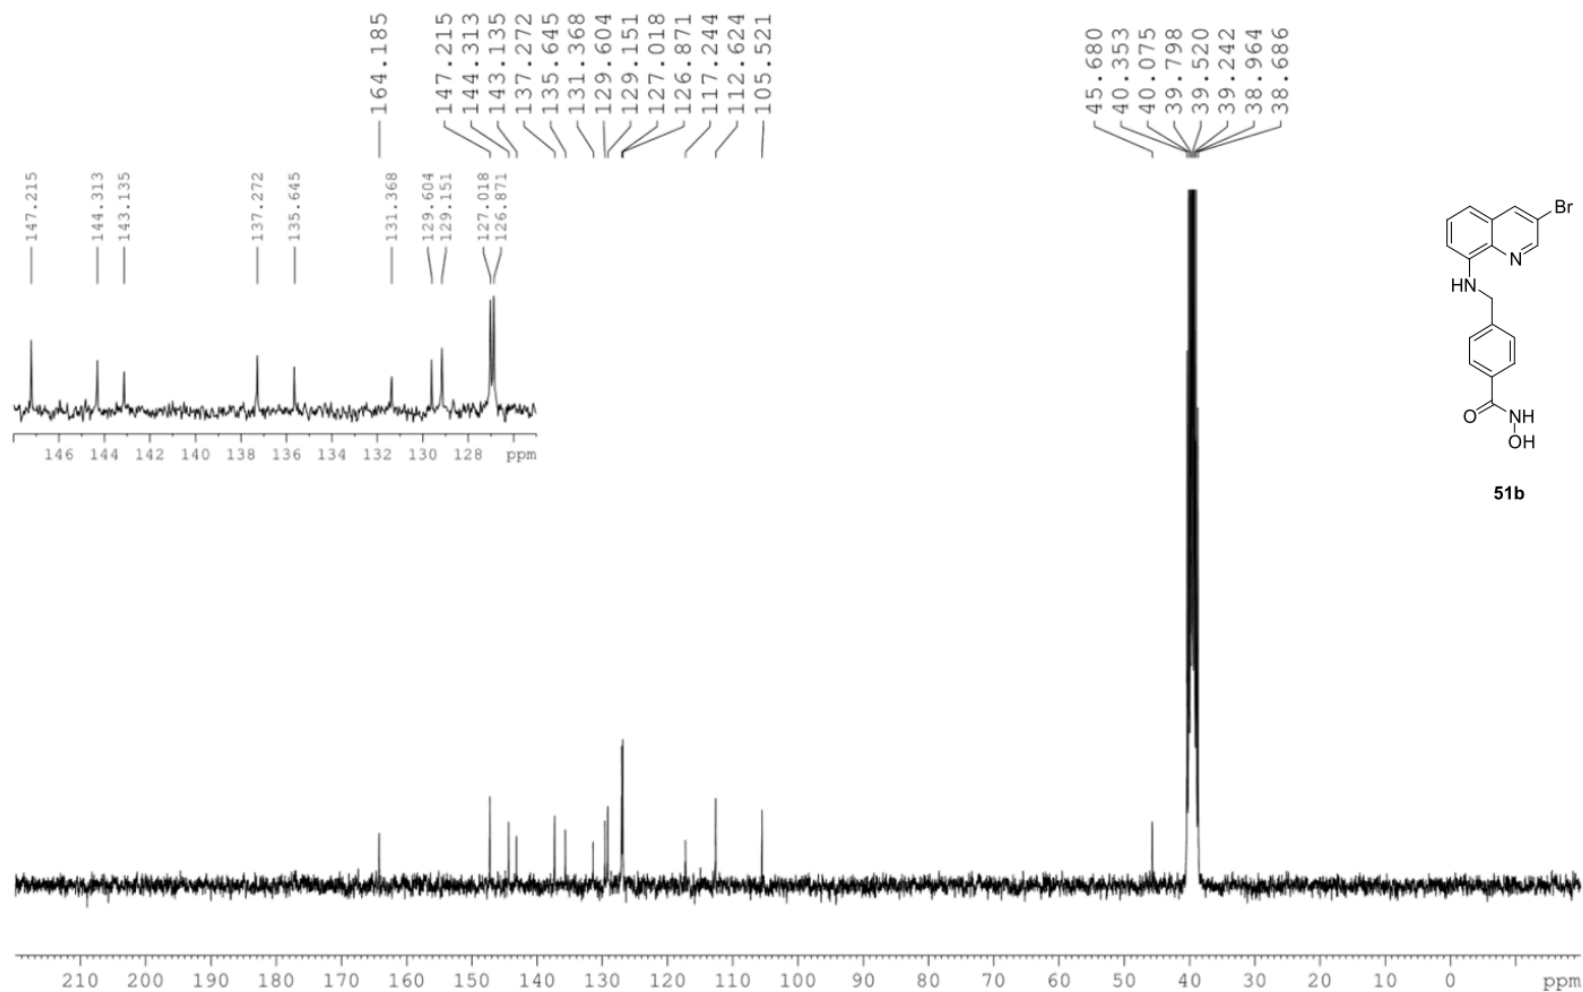

**$^{13}\text{C}$  Spectra for compound 16**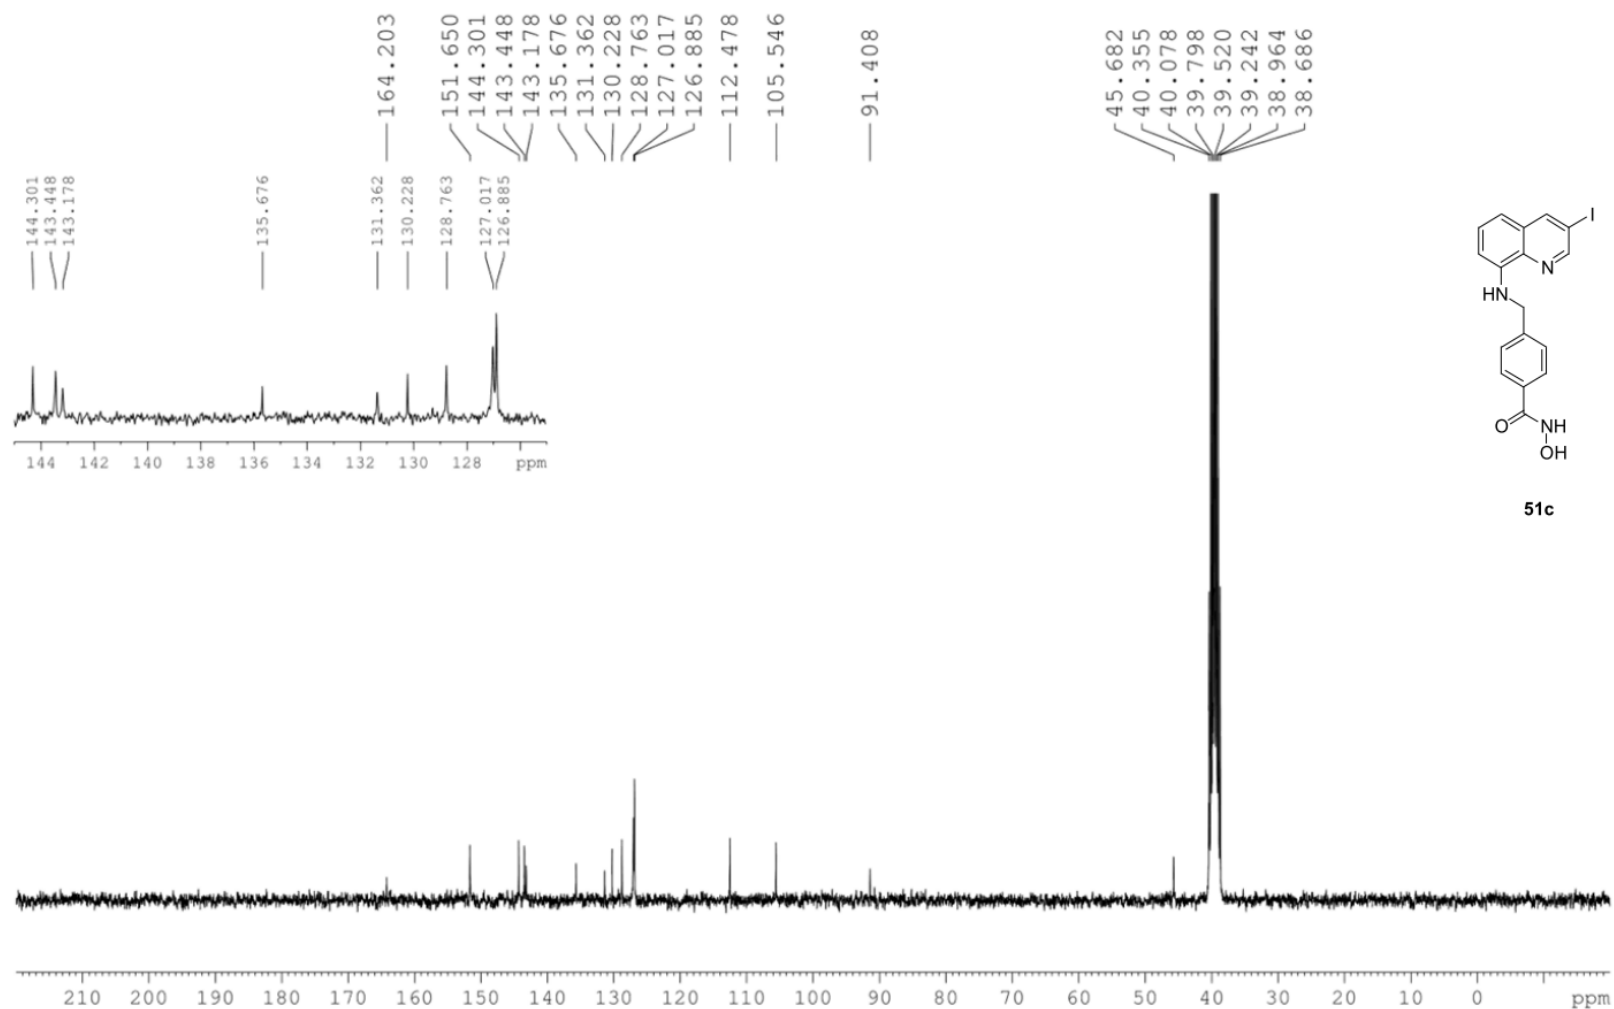

**$^{13}\text{C}$  Spectra for compound 17**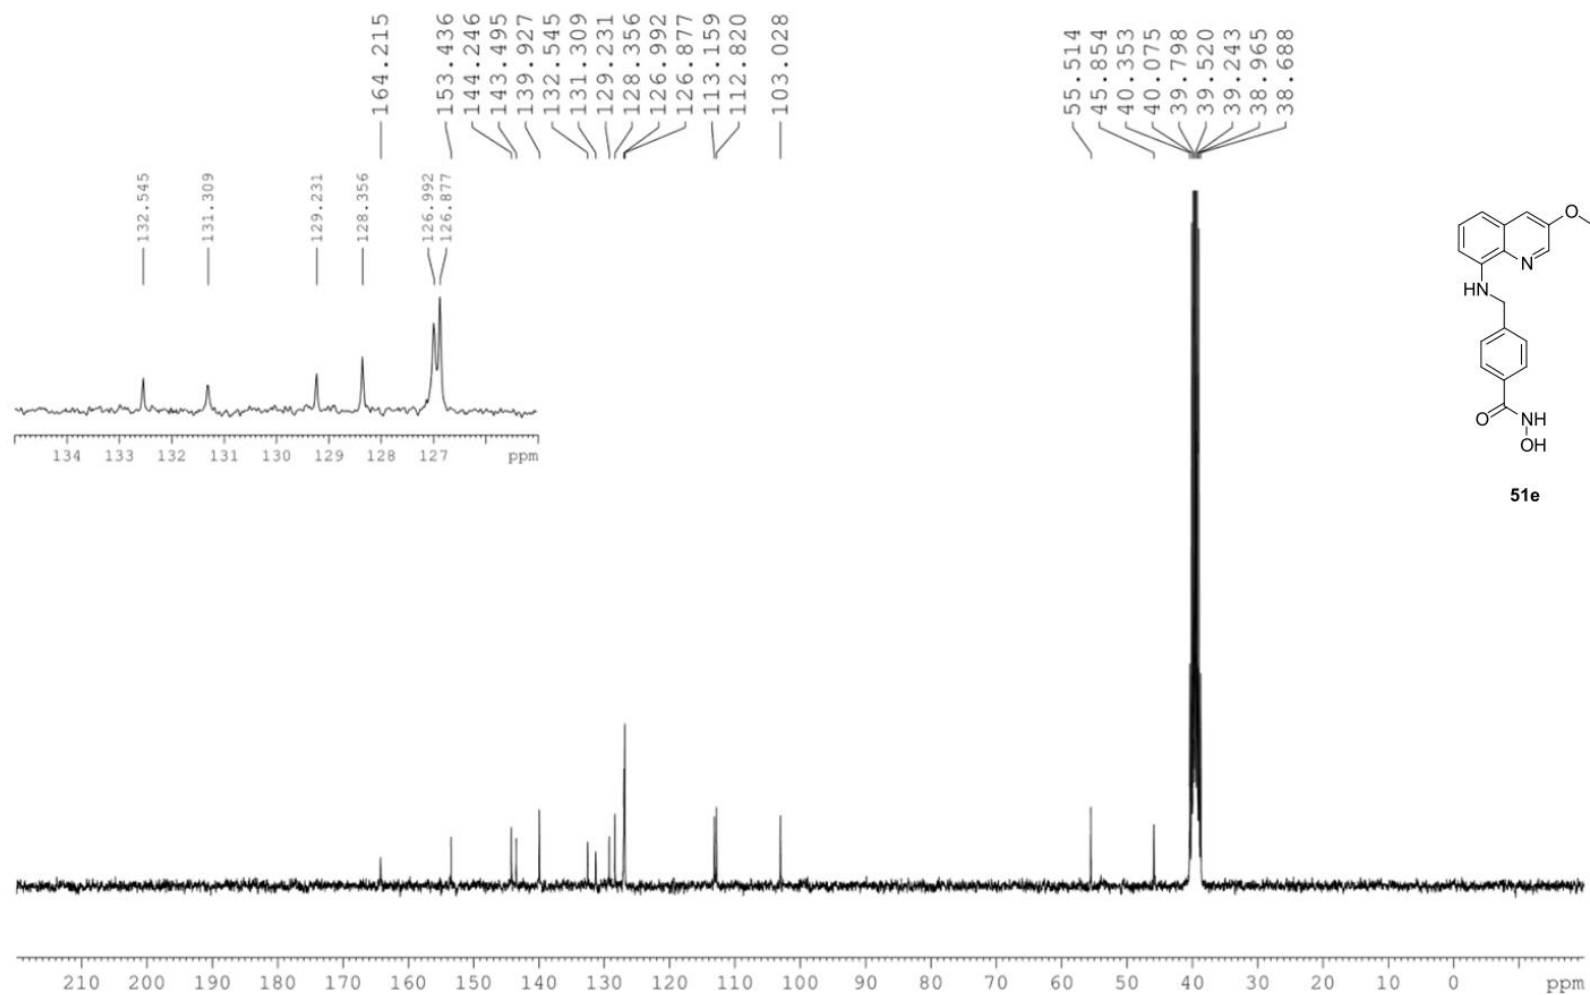

### <sup>13</sup>C Spectra for compound 18

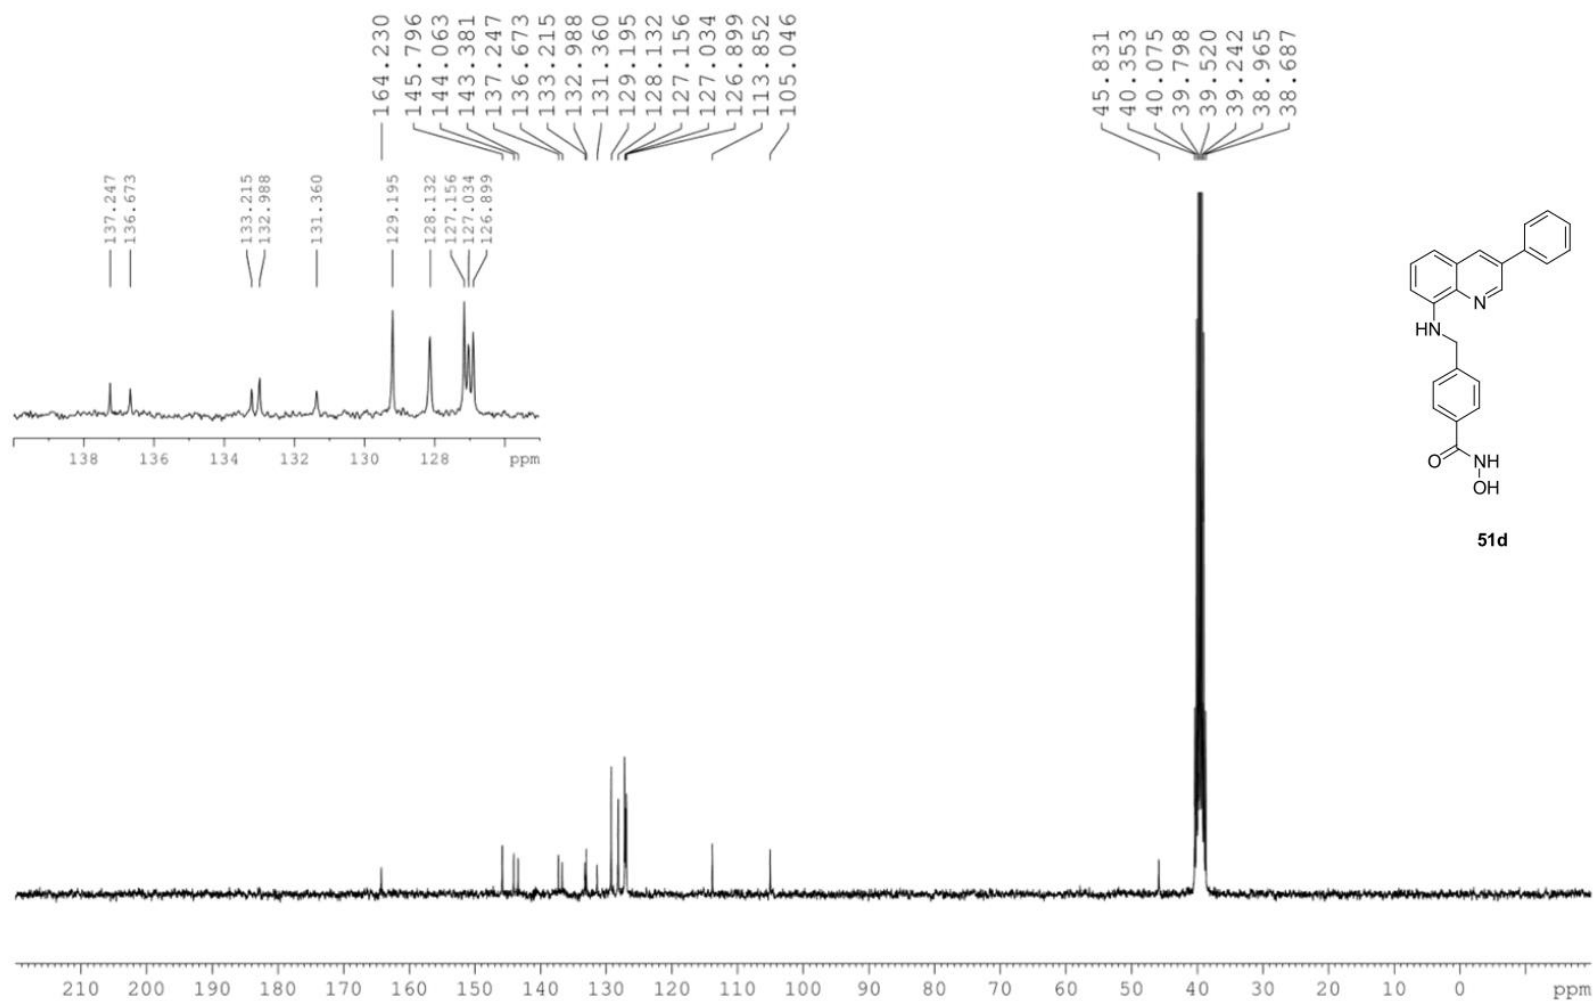

**$^{13}\text{C}$  Spectra for compound 19**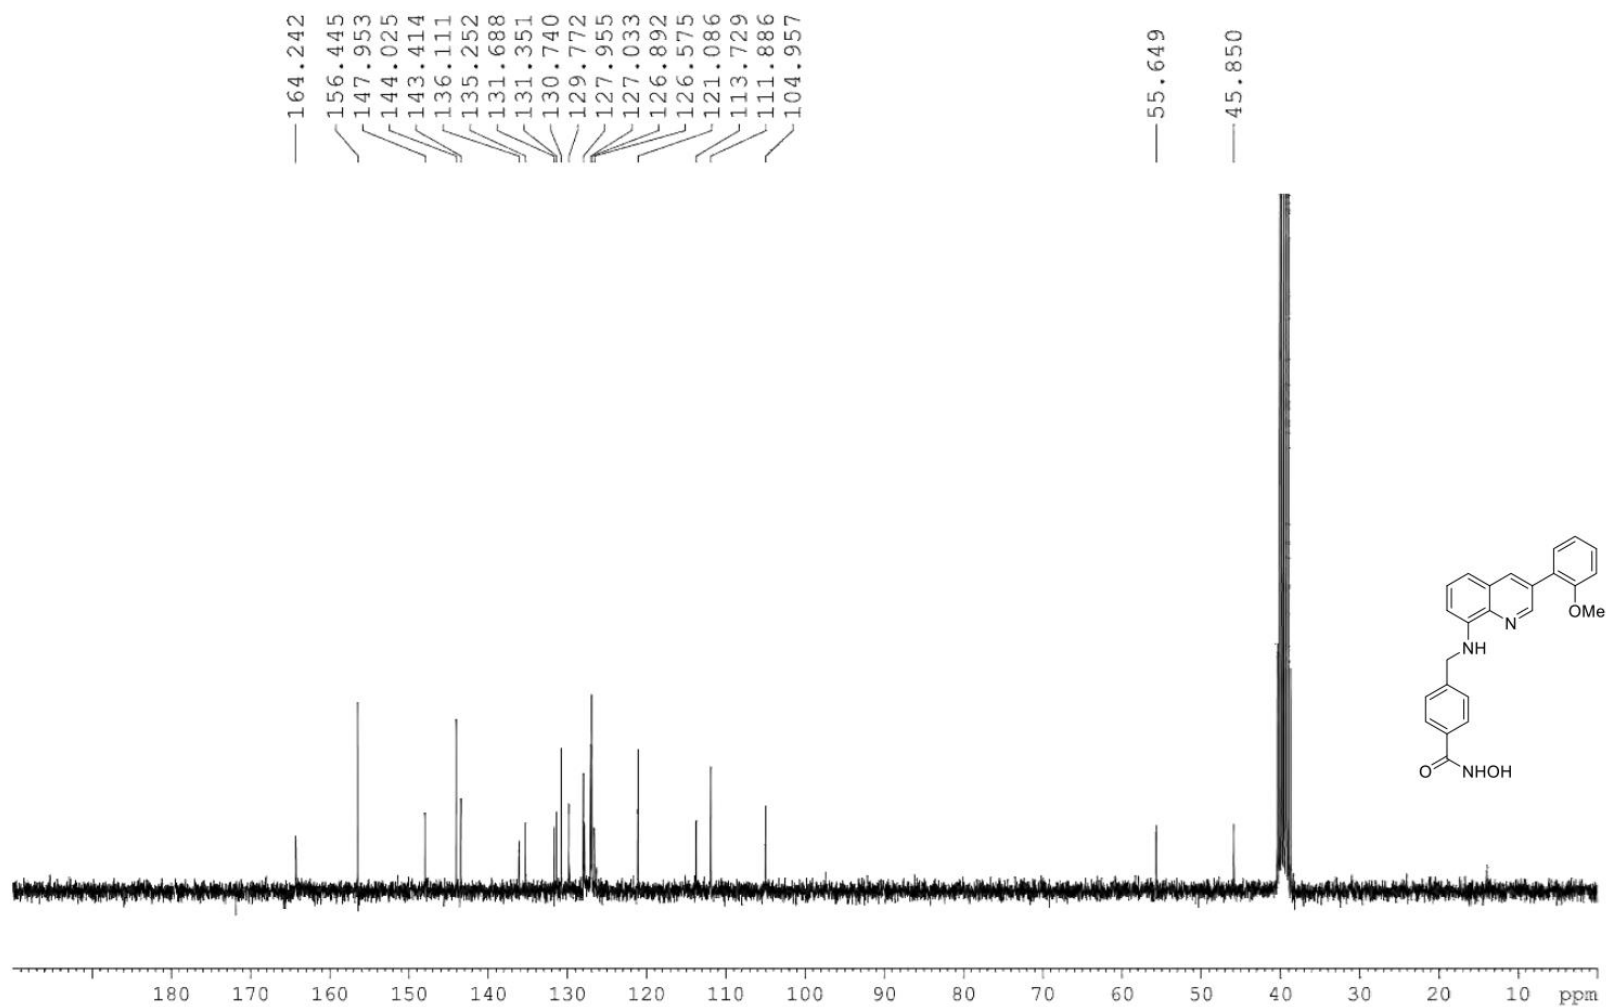

**$^{13}\text{C}$  Spectra for compound 20**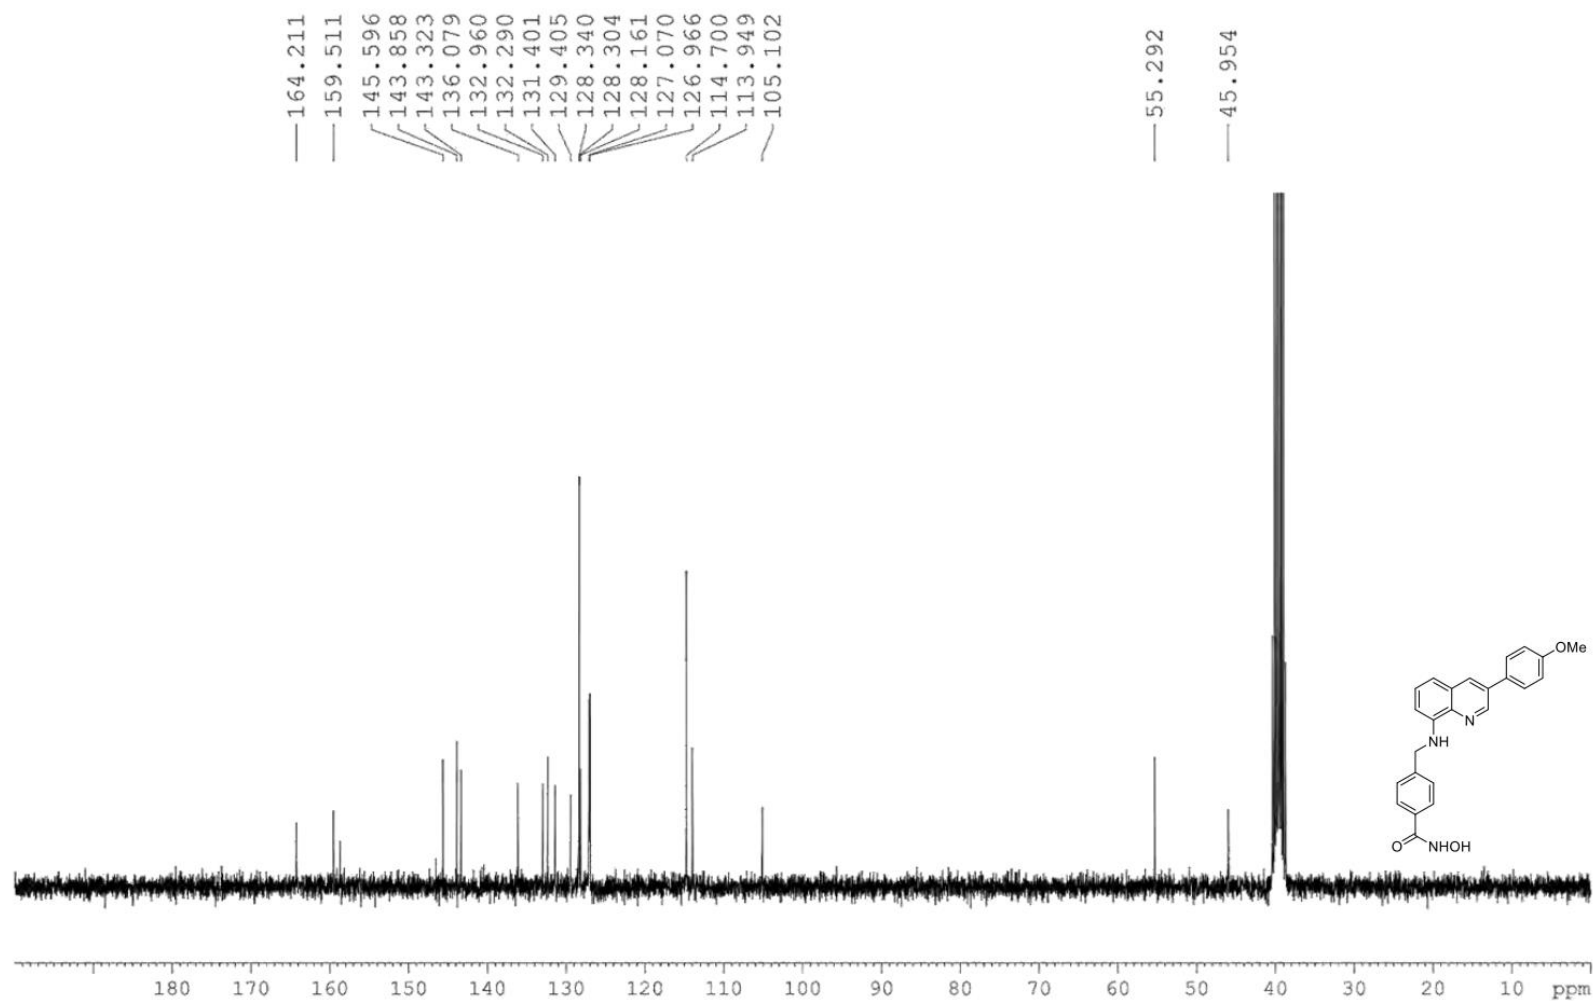



**$^{13}\text{C}$  Spectra for compound 21**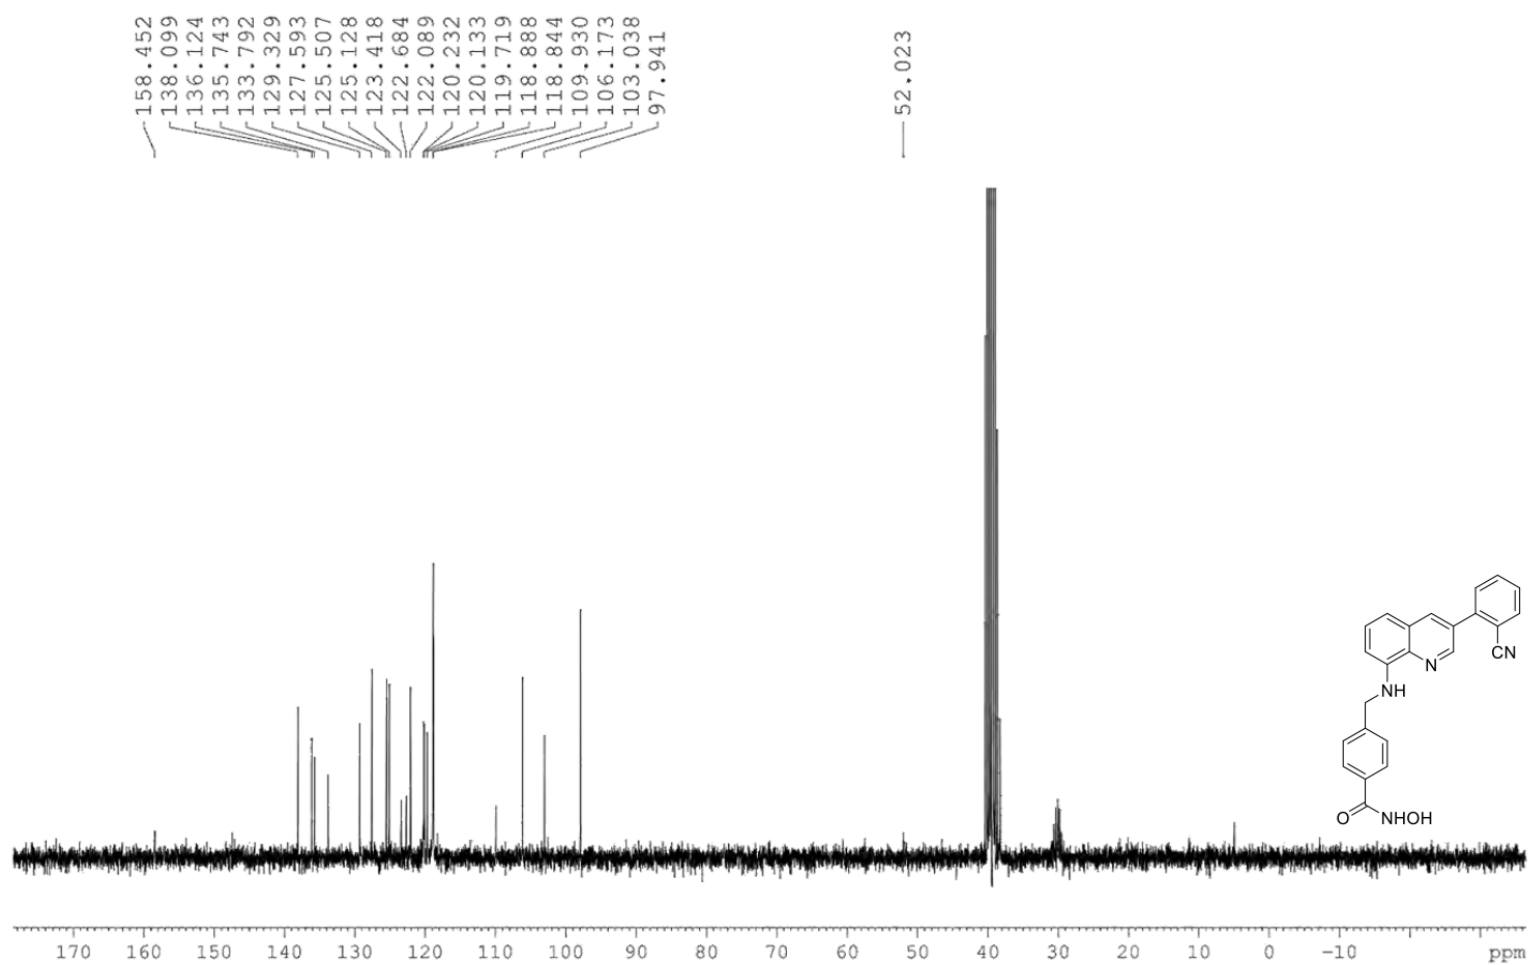

**$^{13}\text{C}$  Spectra for compound 22**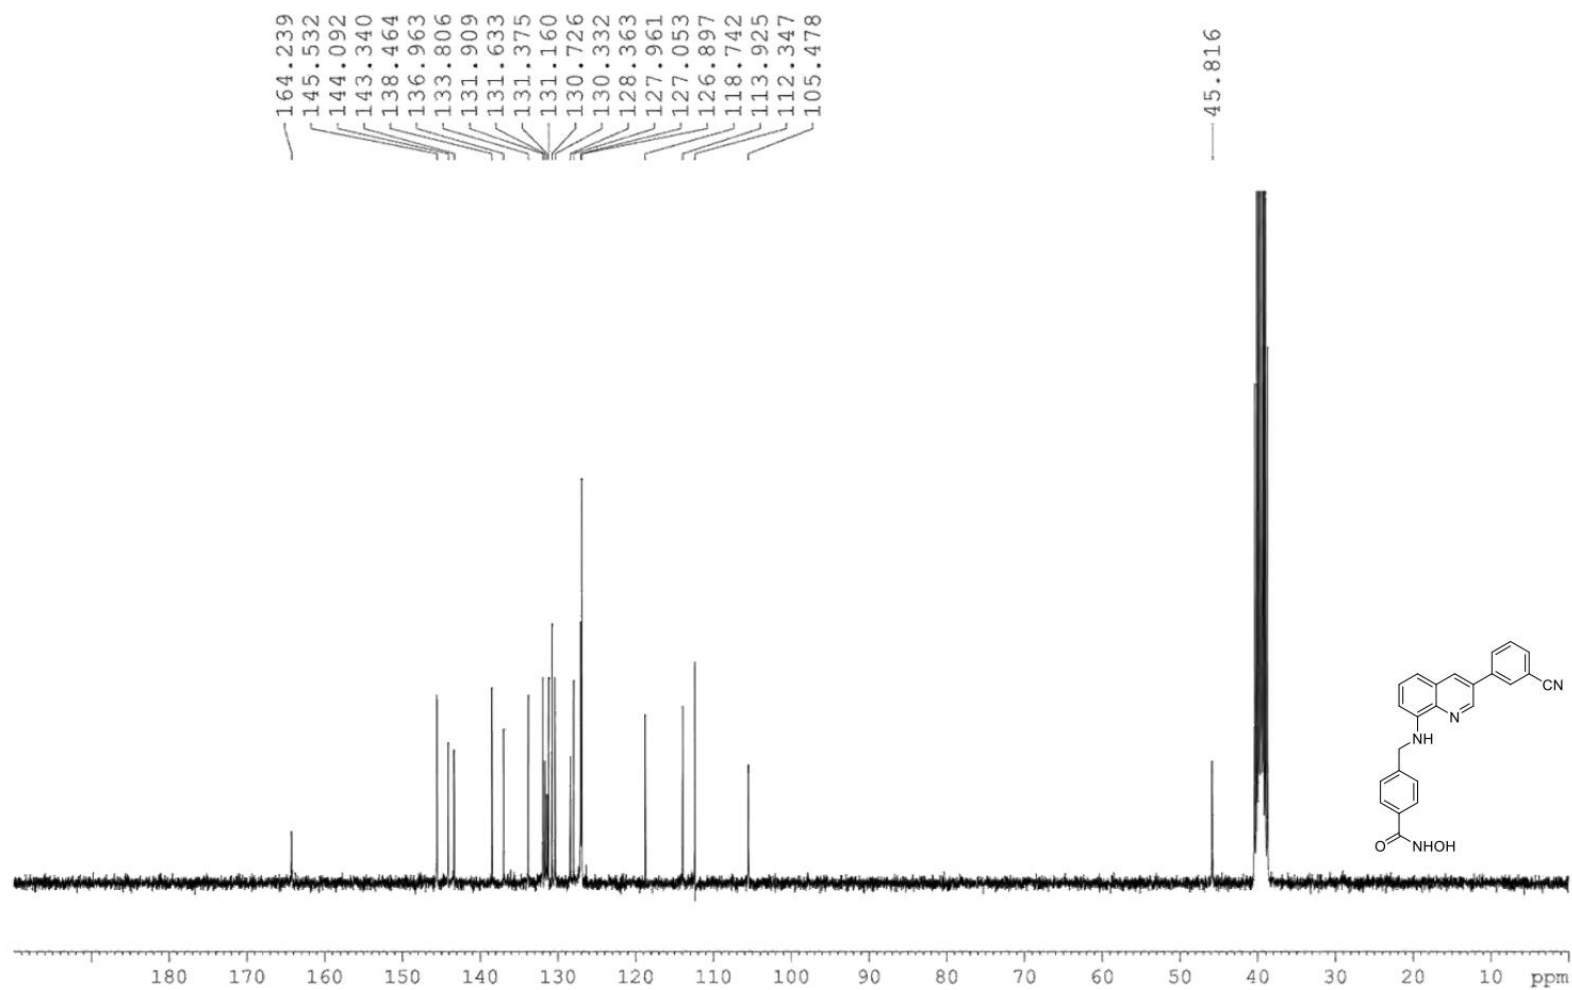

**$^{13}\text{C}$  Spectra for compound 23**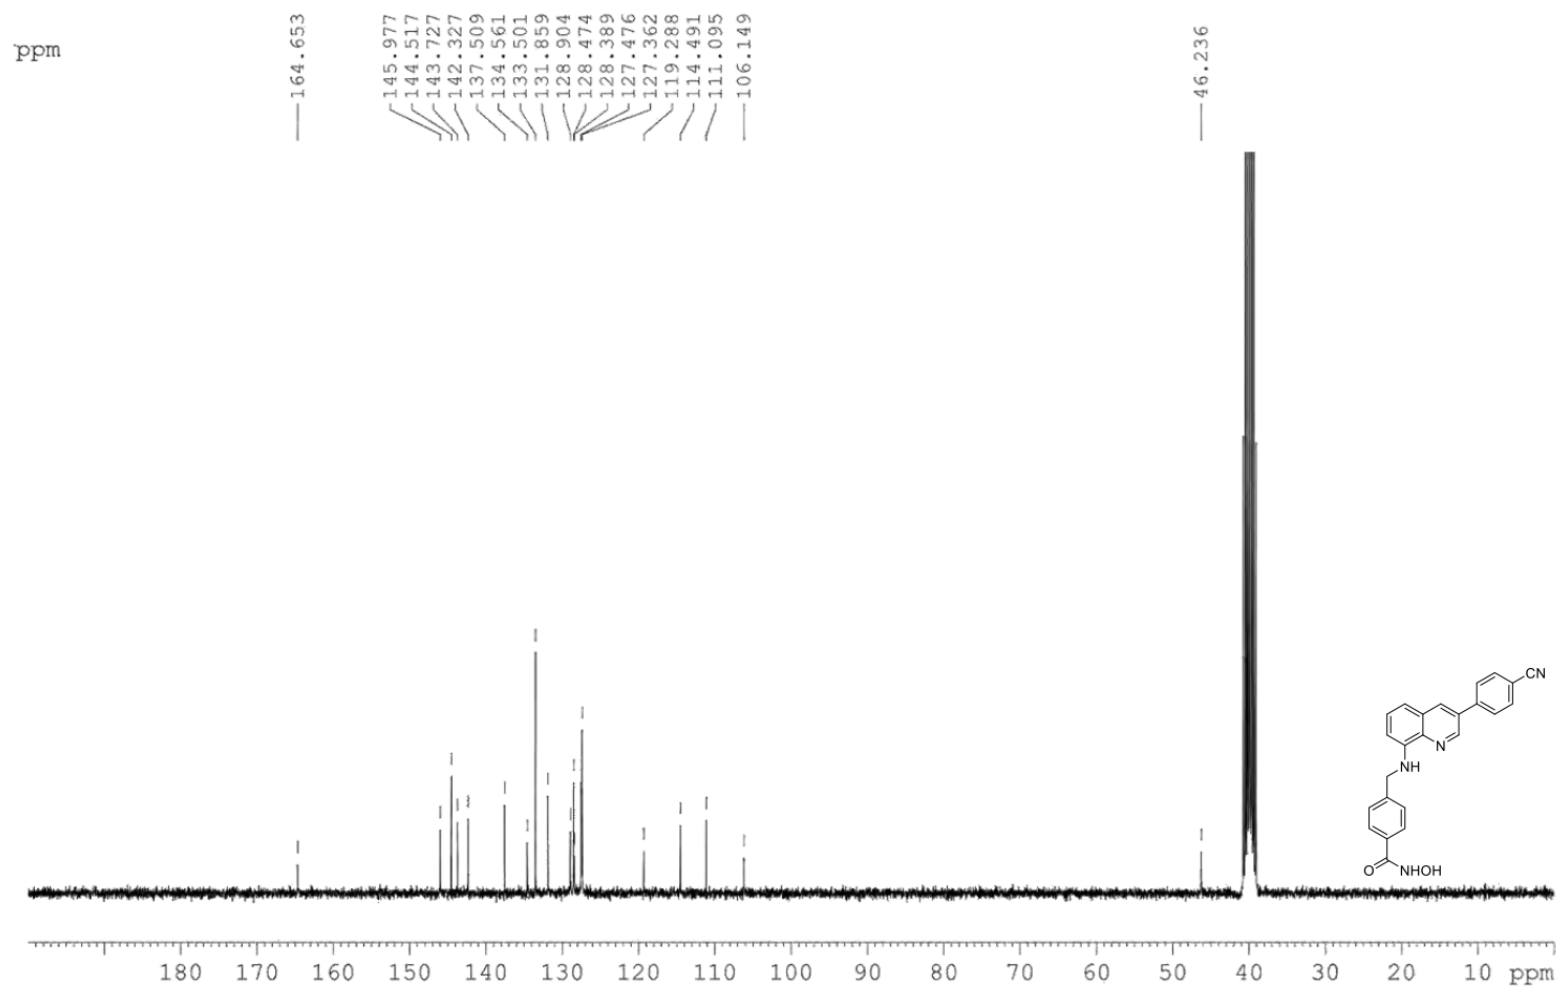

**$^{13}\text{C}$  Spectra for compound 24**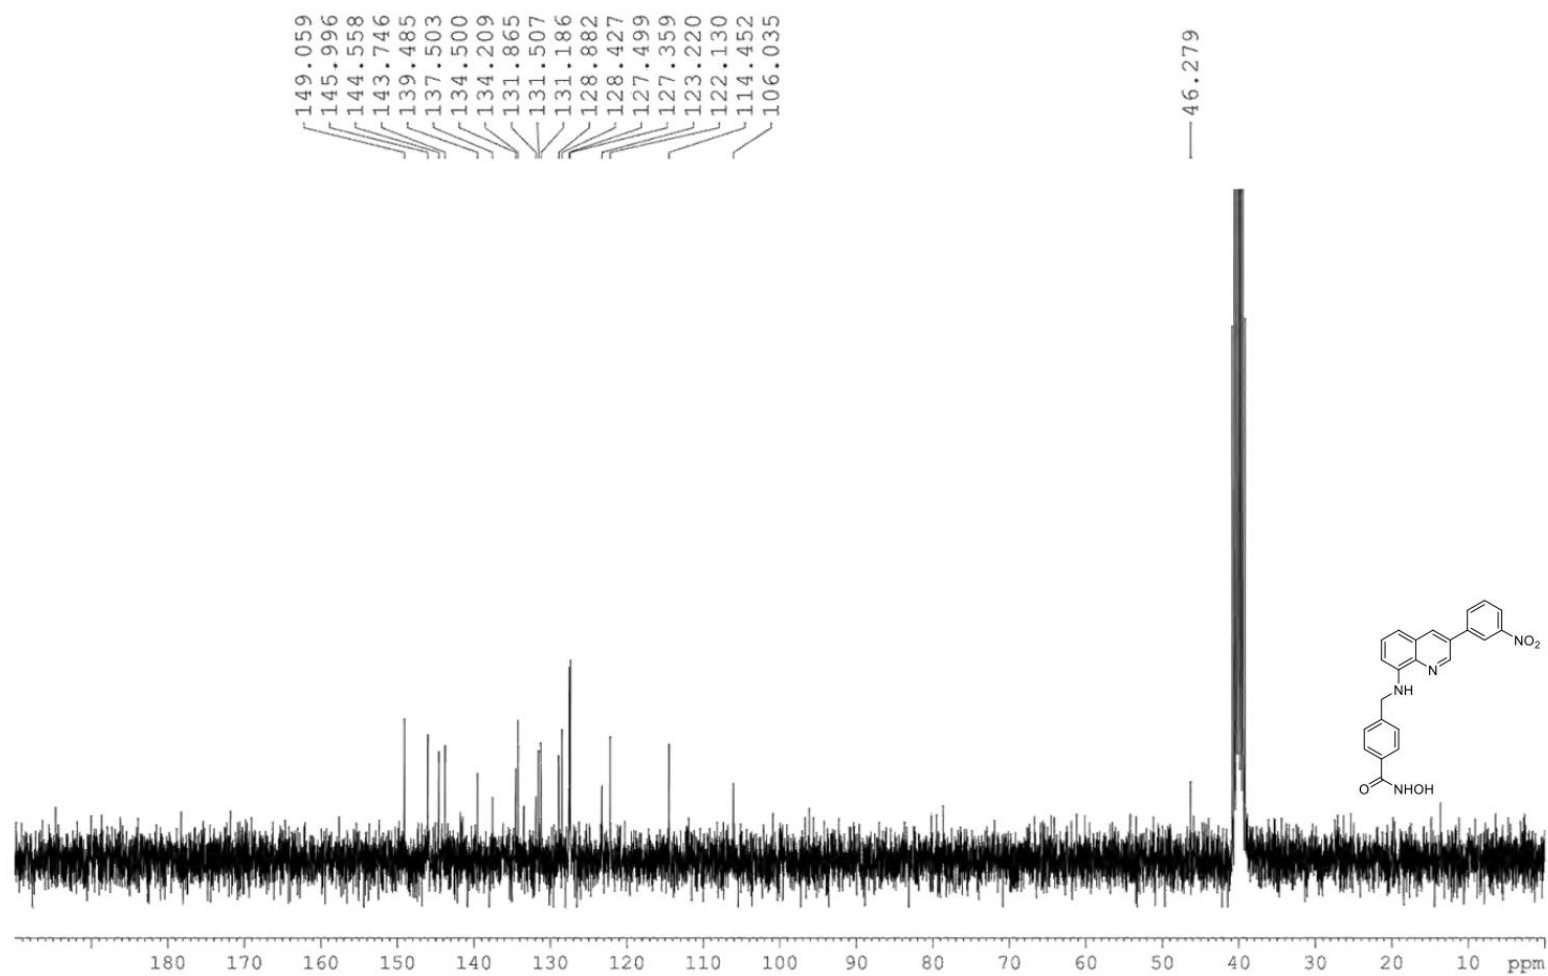

**$^{13}\text{C}$  Spectra for compound 25**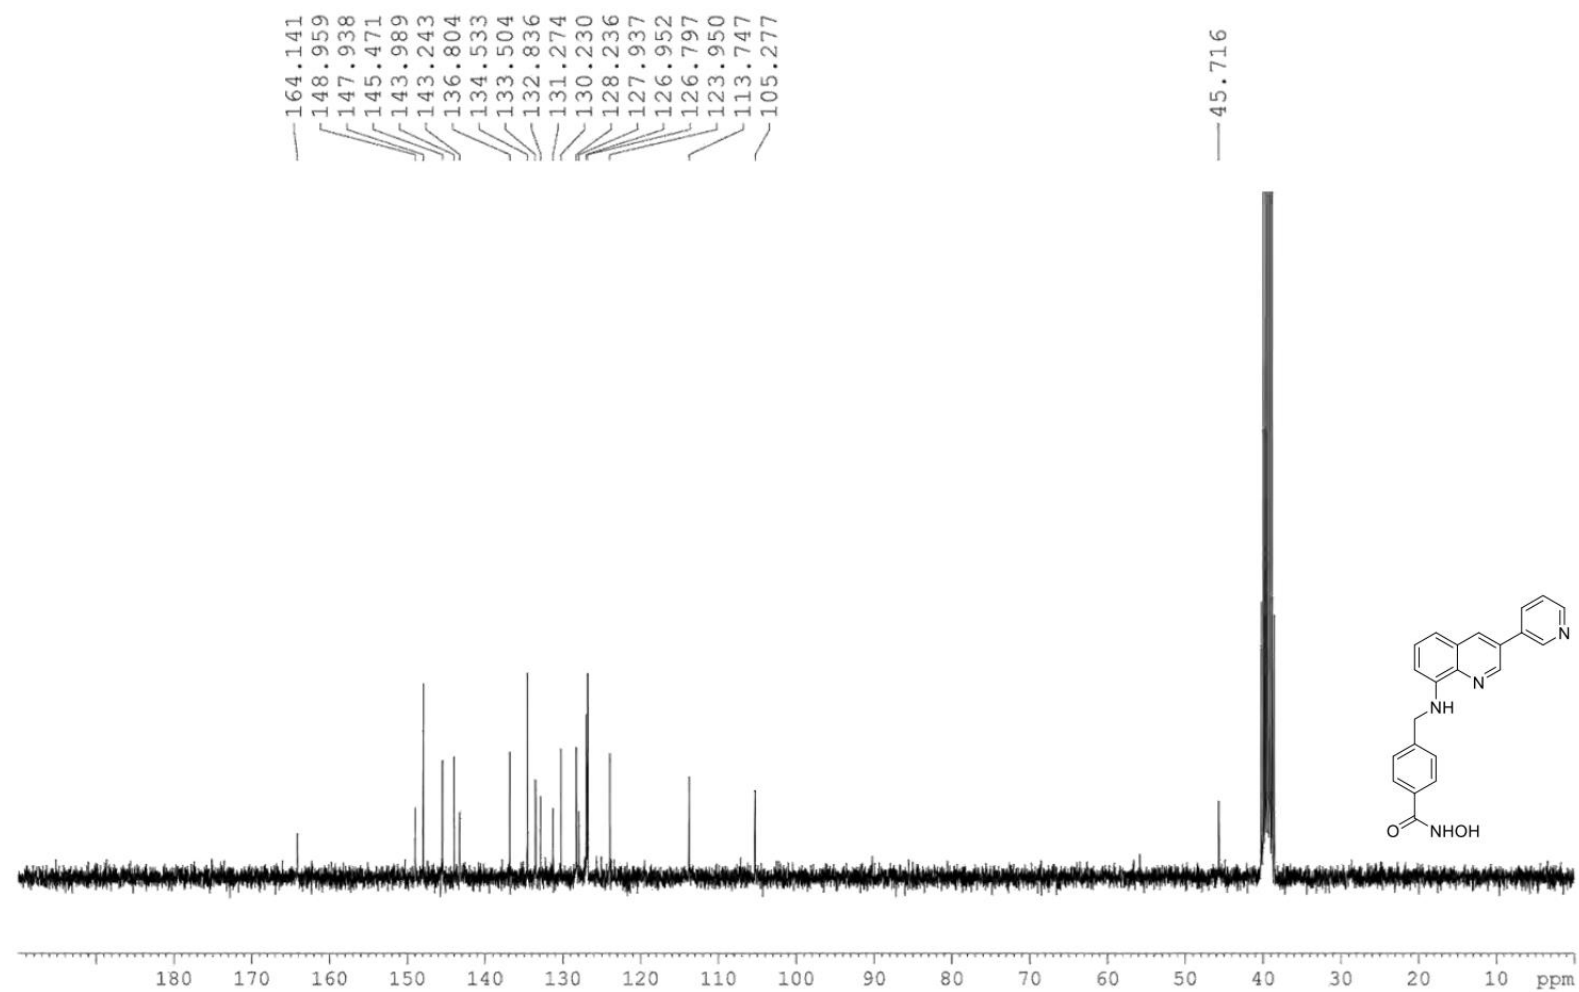

**$^{13}\text{C}$  Spectra for compound 26**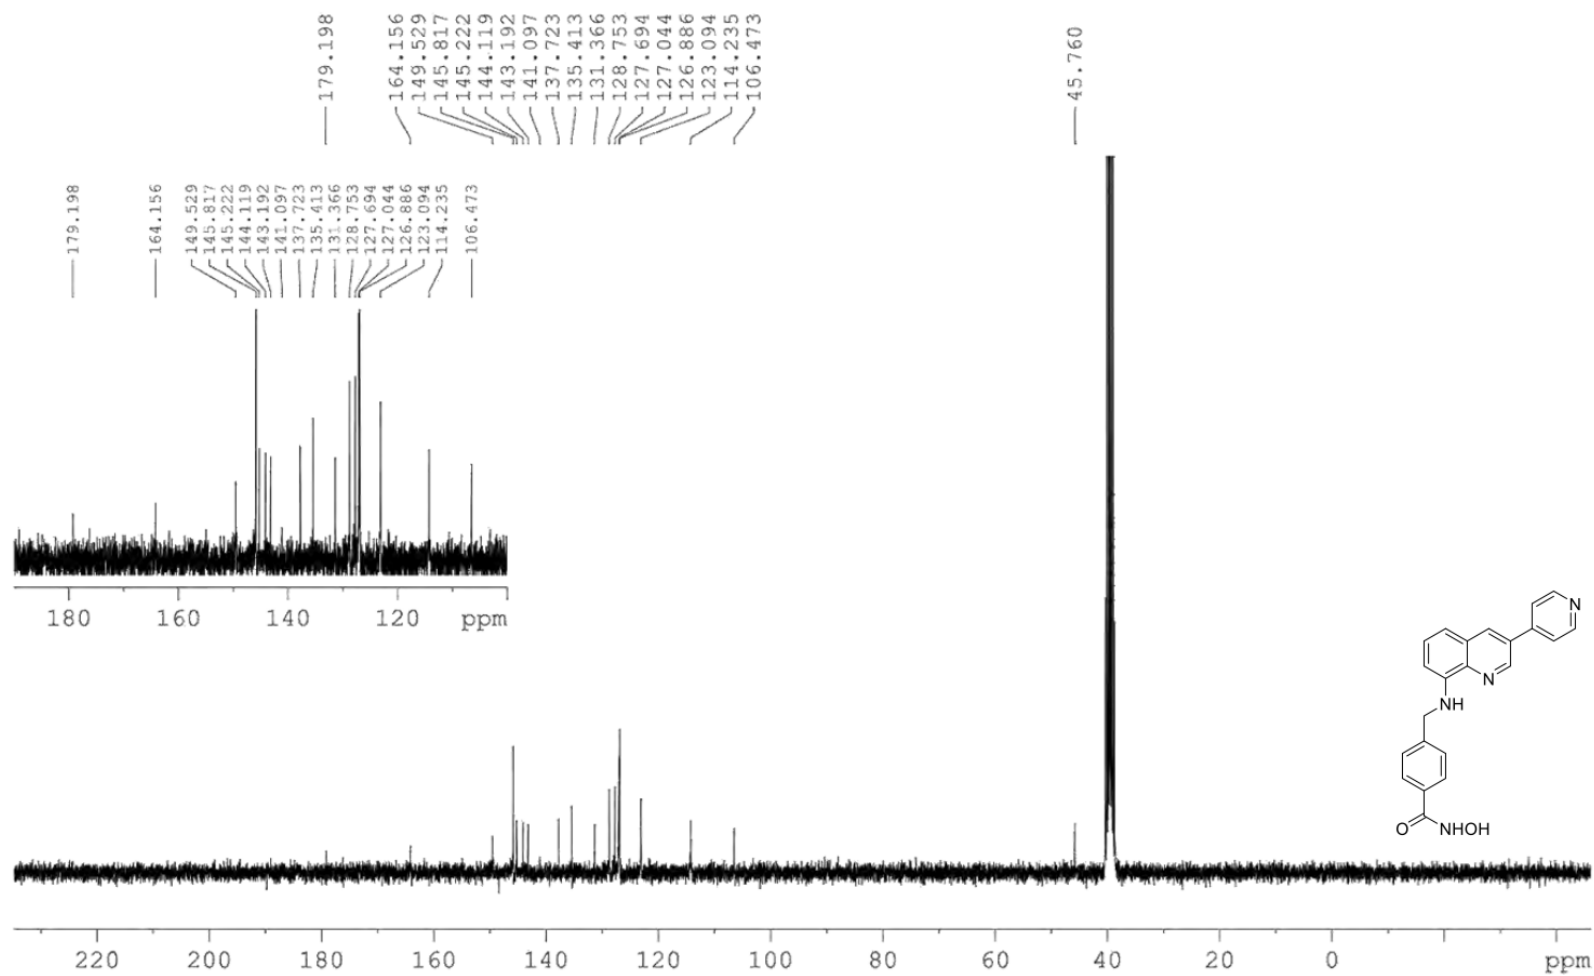

**$^{13}\text{C}$  Spectra for compound 27**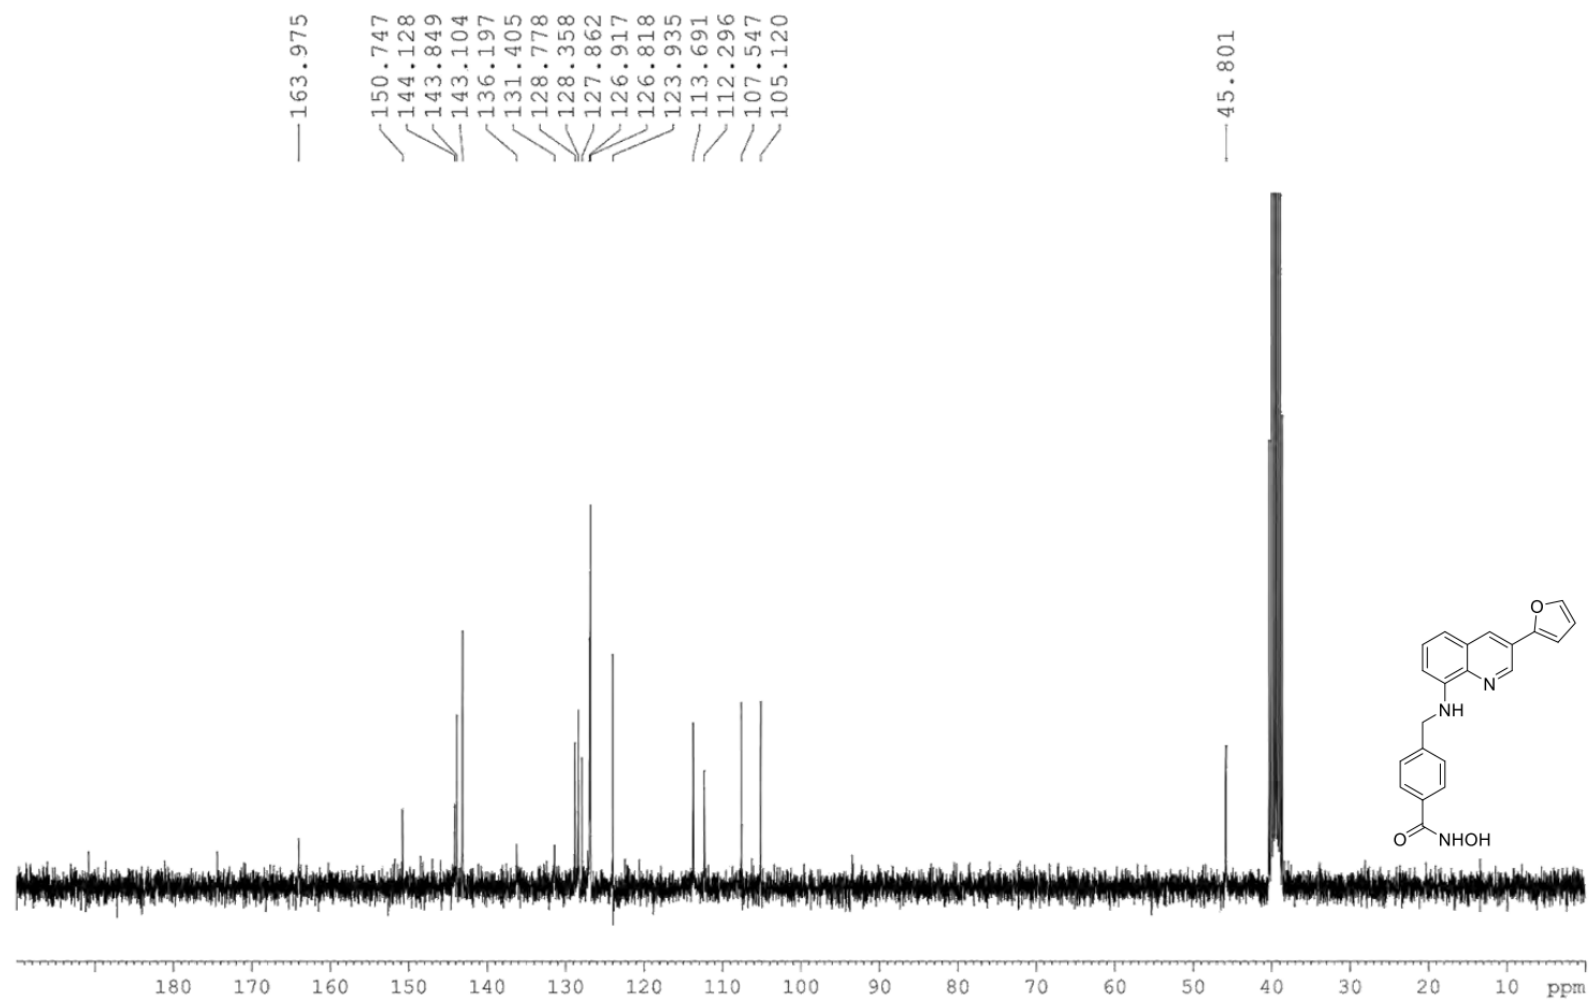

**$^{13}\text{C}$  Spectra for compound 28**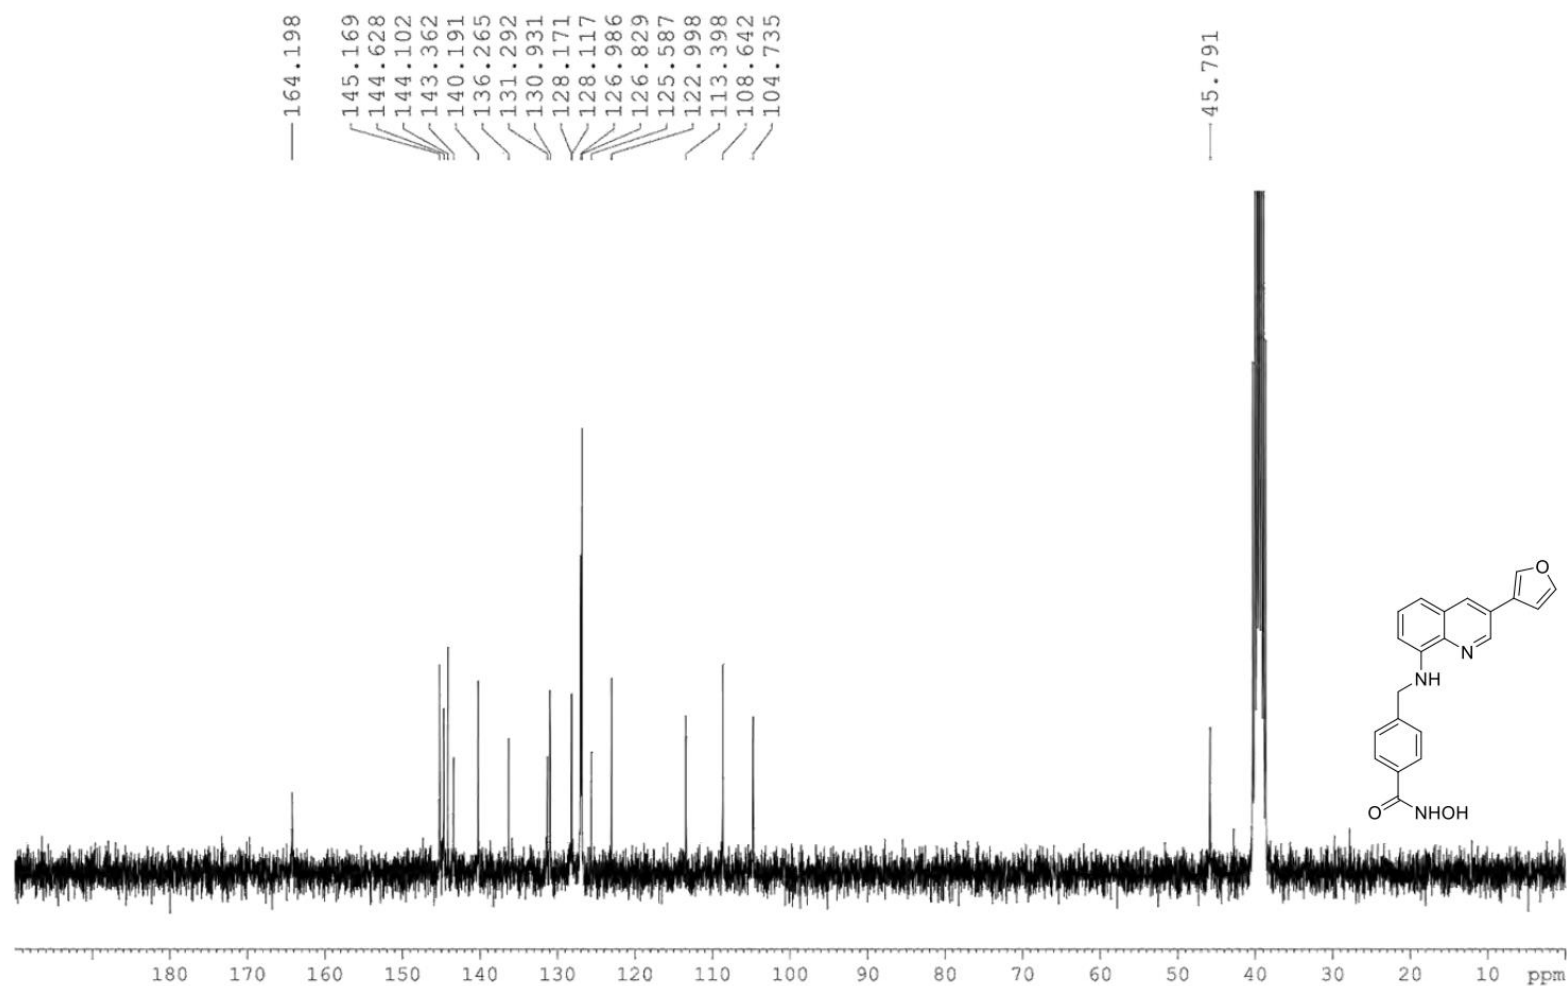



**$^{13}\text{C}$  Spectra for compound 29**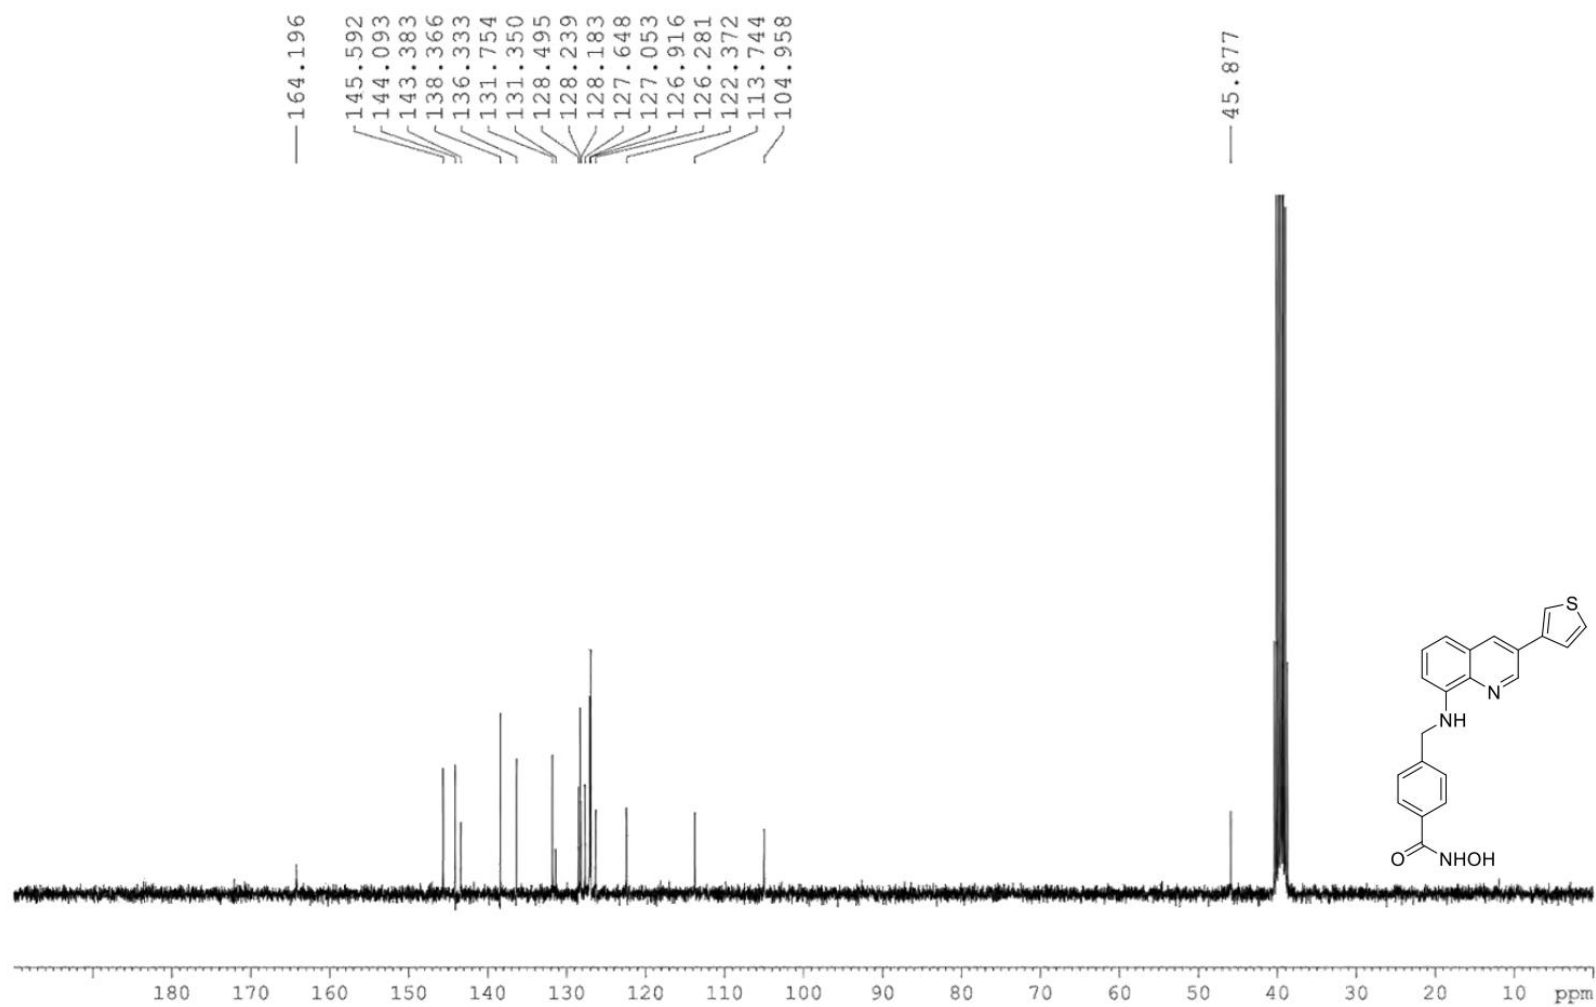

Supplement: Supplementary file [file 25430850]
